# Supplementary material
Source: PubMed Central journal article supplement (PMC3933546)
Supplement: NIHMS555130-supplement-2_si_001.pdf [file NIHMS555130-supplement-2_si_001.pdf]

# Supporting Information

for

**Catalytic reduction of N<sub>2</sub> to NH<sub>3</sub> by an Fe-N<sub>2</sub> complex featuring a C-atom anchor.**

Sidney E. Creutz and Jonas C. Peters\*

Division of Chemistry and Chemical Engineering, California Institute of Technology, Pasadena, California 91125,  
United States

## Table of Contents

**S2** Additional synthetic details

**S3** Spectroscopic characterization of compounds **1-14**

**S15** Catalytic ammonia production studies

**S24** Crystallographic data

**S34** Details of computational results

**Synthesis of *o*-nitrotriphenylmethane:** (Note: The synthesis of this species, a precursor to *o*-iodotriphenylmethane, has been previously reported;<sup>1</sup> here we report the synthesis again in order to detail slight modifications to the workup and purification procedures that facilitate its synthesis. The syntheses of *o*-aminotriphenylmethane and *o*-iodotriphenylmethane have not been substantially modified from the previously reported procedures.) Aluminum chloride (30.36 g, 0.228 mol) was suspended in 100 mL of benzene and *o*-nitrobenzaldehyde (15 g, 0.099 mol) was added as a solid in portions over 15 minutes while stirring at room temperature. The reaction mixture was heated to reflux for 6 hours, then cooled to room temperature and poured over ice (300 mL). The mixture was diluted with another 100 mL of benzene and 100 mL of water. The aqueous layer was removed and washed twice with benzene (100 mL); the dark brown organic washings were then combined and washed repeatedly with concentrated H<sub>2</sub>SO<sub>4</sub> until the color was light yellow-orange. The organic layer was then washed with water (100 mL) and brine (2 x 50 mL), dried over magnesium sulfate, filtered, and concentrated. The off-white oily residue was recrystallized from methanol to give a white crystalline solid which was collected atop a glass frit and washed with cold methanol (15.6 g, 54%). <sup>1</sup>H NMR (CDCl<sub>3</sub>, 300 MHz, 298 K,  $\delta$ ): 7.89 (d,  $J$  = 8 Hz, 1H), 7.49 (t,  $J$  = 8 Hz, 1H), 7.39 (t,  $J$  = 8 Hz, 1H), 7.34-7.23 (m, 6H), 7.14-7.08 (m, 4H) ppm. <sup>13</sup>C NMR (CDCl<sub>3</sub>, 75.4 MHz, 298 K,  $\delta$ ): 149.77 (s), 141.95 (s), 138.13 (s), 132.41 (s), 132.04 (s), 129.51 (s), 128.54 (s), 127.49 (s), 126.85 (s), 124.76 (s) ppm.

---

<sup>1</sup> Kliegl, A. *Ber. Deutsch. Chem. Ges.* **1908**, *40*, 4937-42.

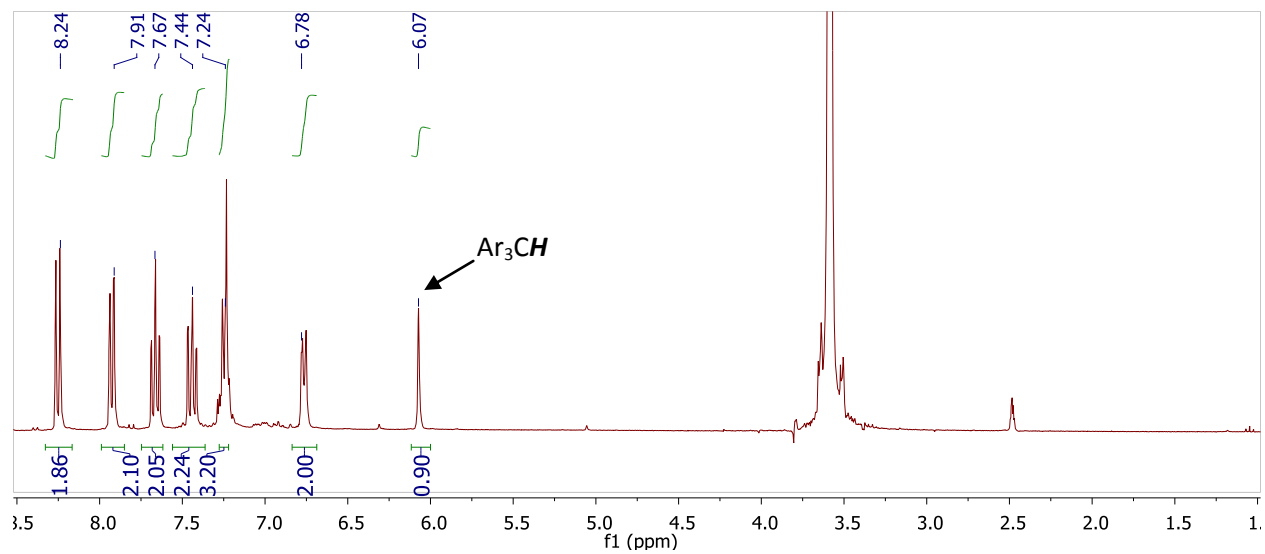

Figure S1.  $^1\text{H}$  NMR of **2** ( $\text{DMSO-}d_6$ , 300 MHz)

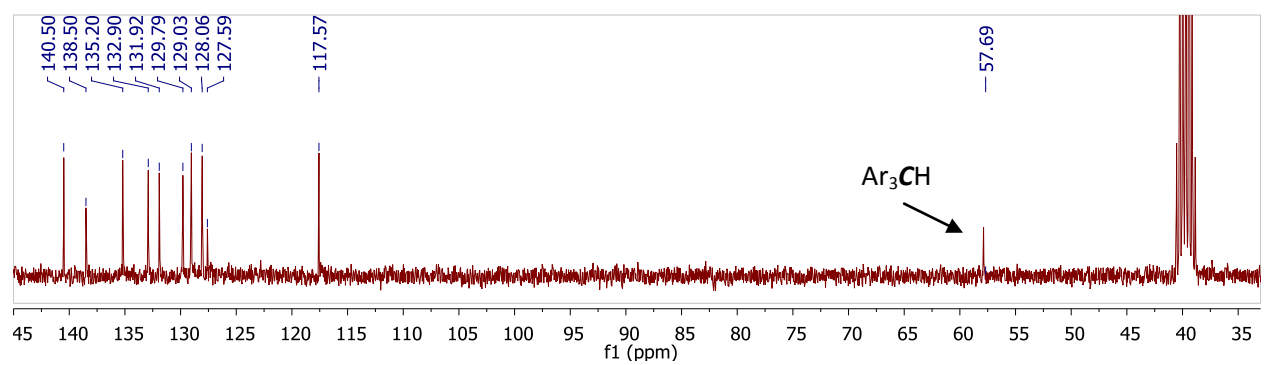

Figure S2.  $^{13}\text{C}$  NMR of **2** ( $\text{DMSO-}d_6$ , 75 MHz)

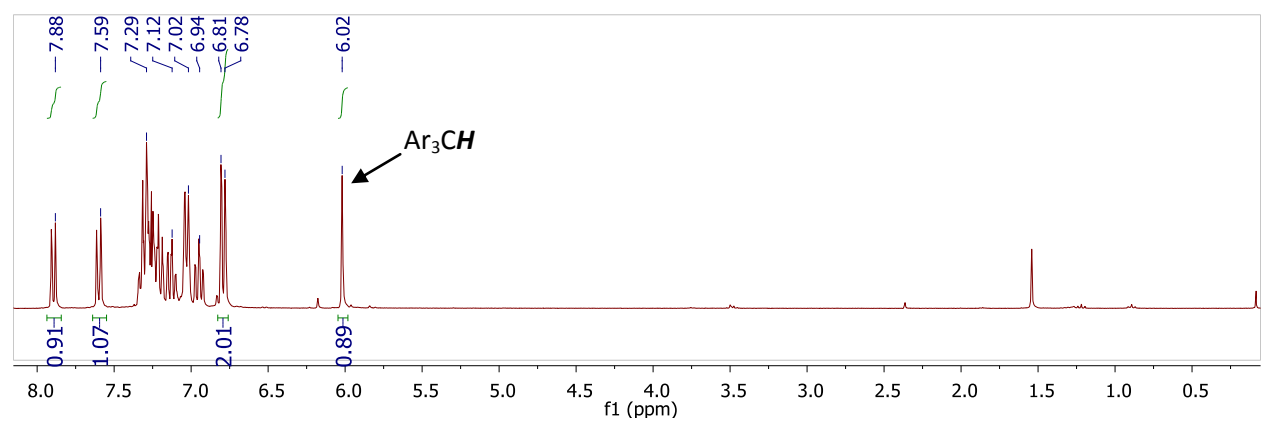

Figure S3.  $^1\text{H}$  NMR of **3** ( $\text{CDCl}_3$ , 300 MHz)

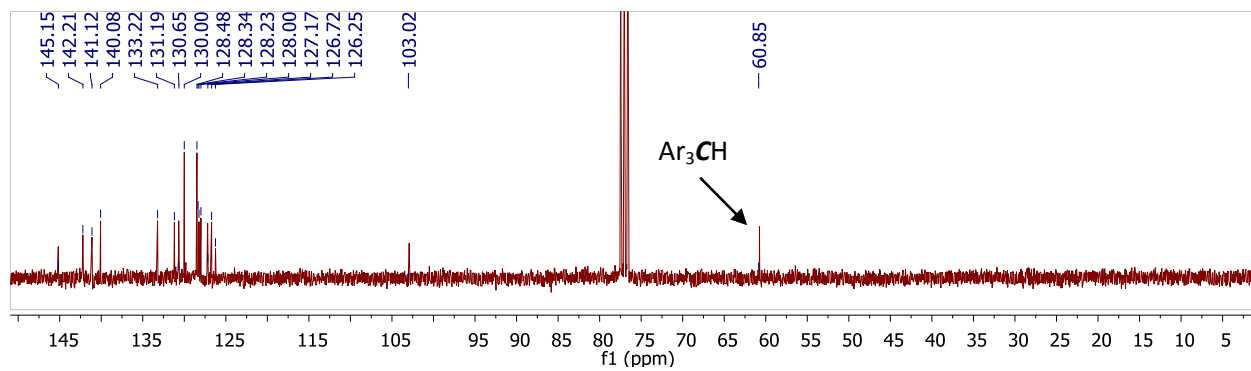

Figure S4.  $^{13}\text{C}$  NMR of **3** ( $\text{CDCl}_3$ , 75 MHz)

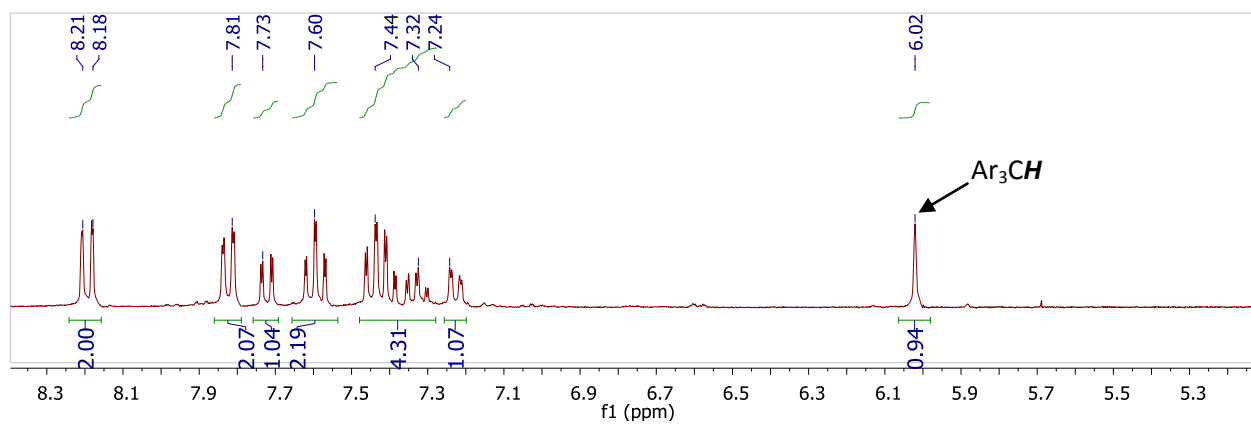

Figure S5.  $^1\text{H}$  NMR of **4** (aromatic region) in  $\text{DMSO}-d_6$  (300 MHz)

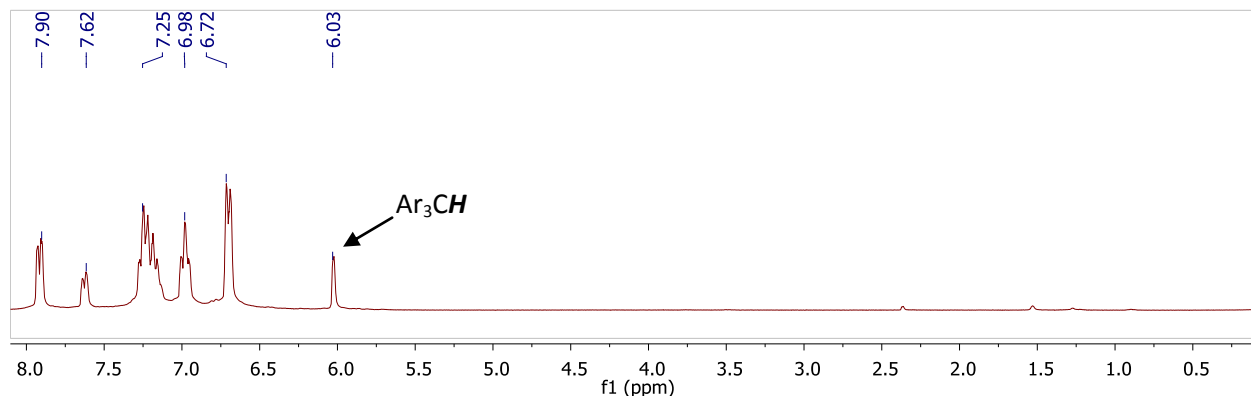

Figure S6.  $^1\text{H}$  NMR of **5** ( $\text{CDCl}_3$ , 300 MHz)

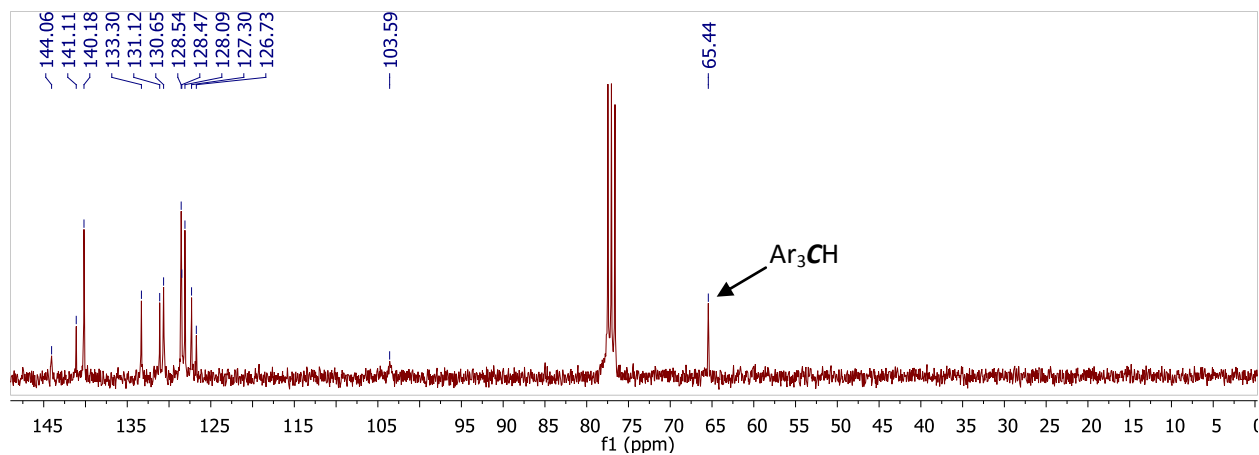

Figure S7. <sup>13</sup>C NMR of **5** (CDCl<sub>3</sub>, 75 MHz)

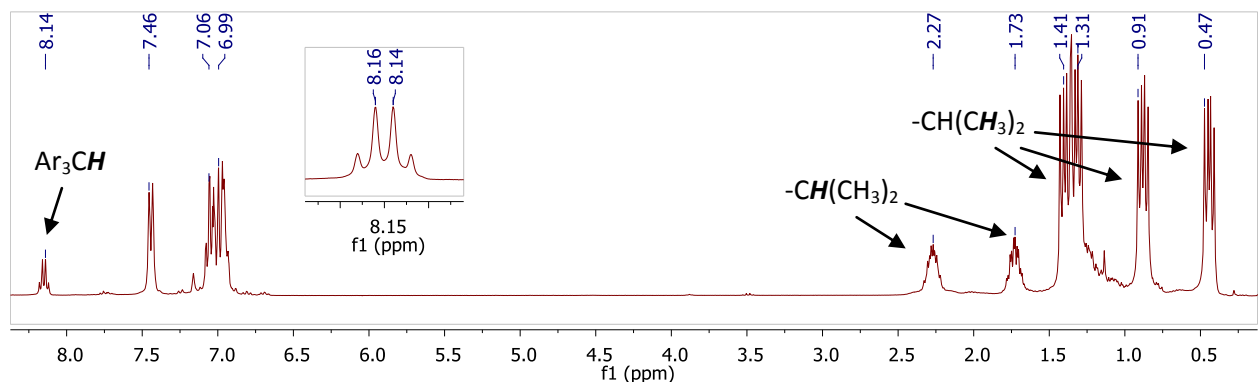

Figure S8. <sup>1</sup>H NMR of **1** (C<sub>6</sub>D<sub>6</sub>, 300 MHz) with inset showing coupling to central methine proton.

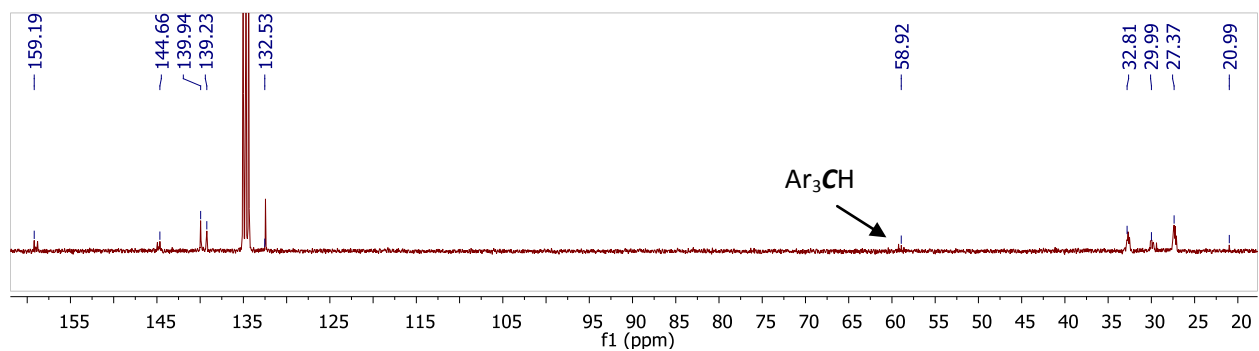

Figure S9. <sup>13</sup>C NMR of **1** (C<sub>6</sub>D<sub>6</sub>, 75 MHz)

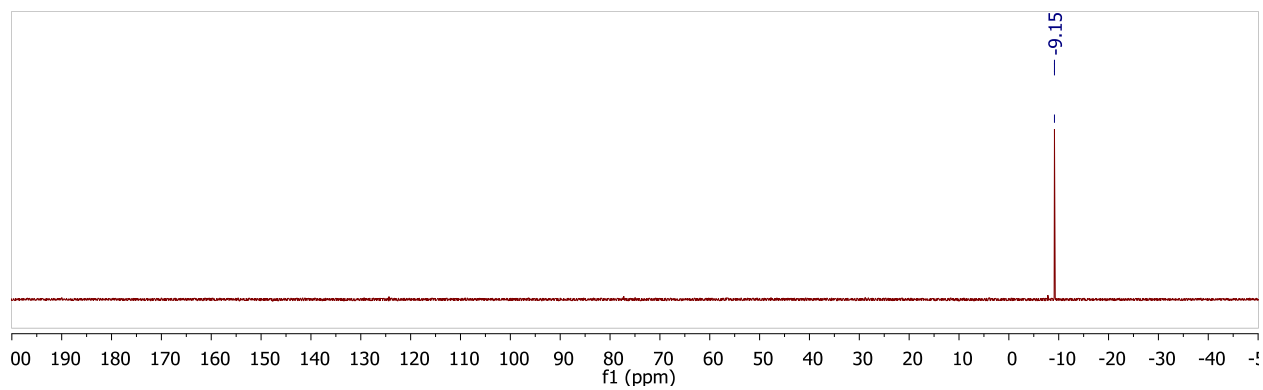

**Figure S10.**  $^{31}\text{P}$  NMR of **1** ( $\text{C}_6\text{D}_6$ , 300 MHz)

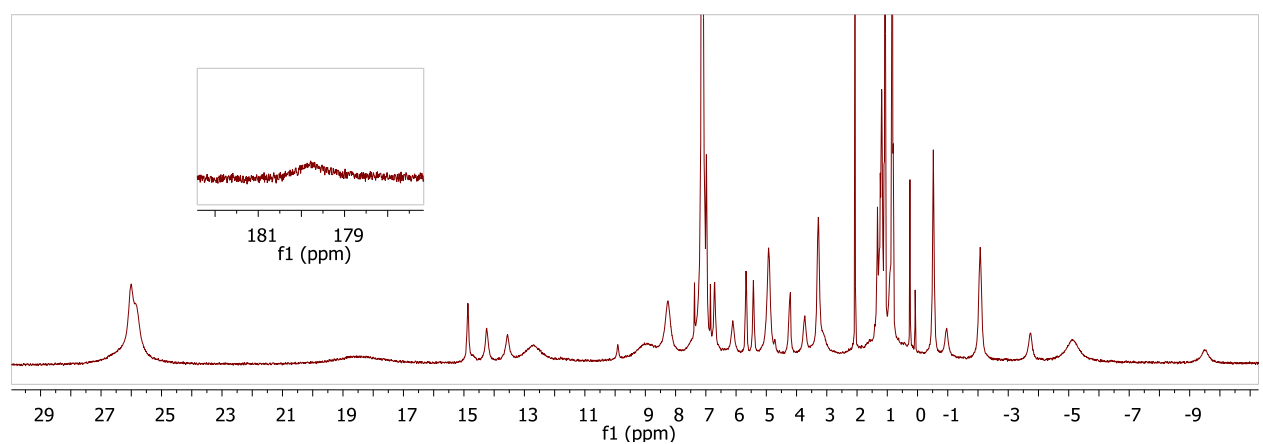

**Figure S11.**  $^1\text{H}$  NMR of **6** ( $\text{C}_6\text{D}_6$ ) with inset showing peak at 180 ppm. No other peaks appear outside the range depicted.

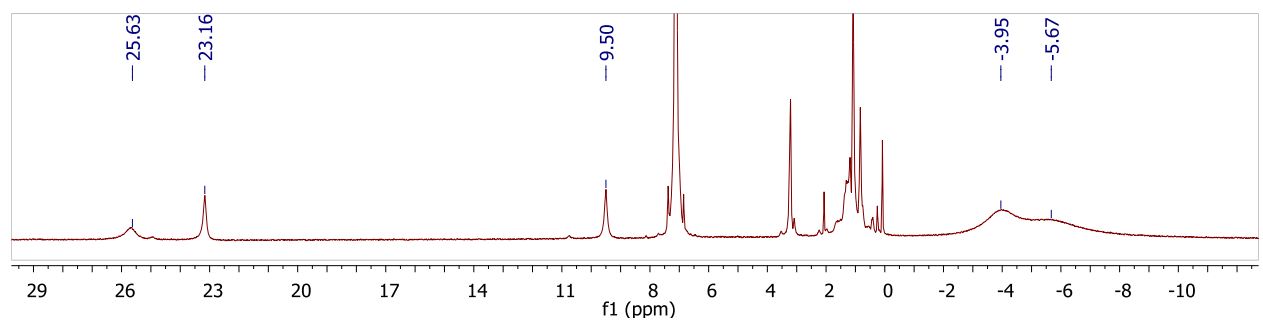

**Figure S12.**  $^1\text{H}$  NMR of **7** ( $\text{C}_6\text{D}_6$ , 300 MHz), unpurified, generated by reduction of **6** with sodium amalgam in benzene.

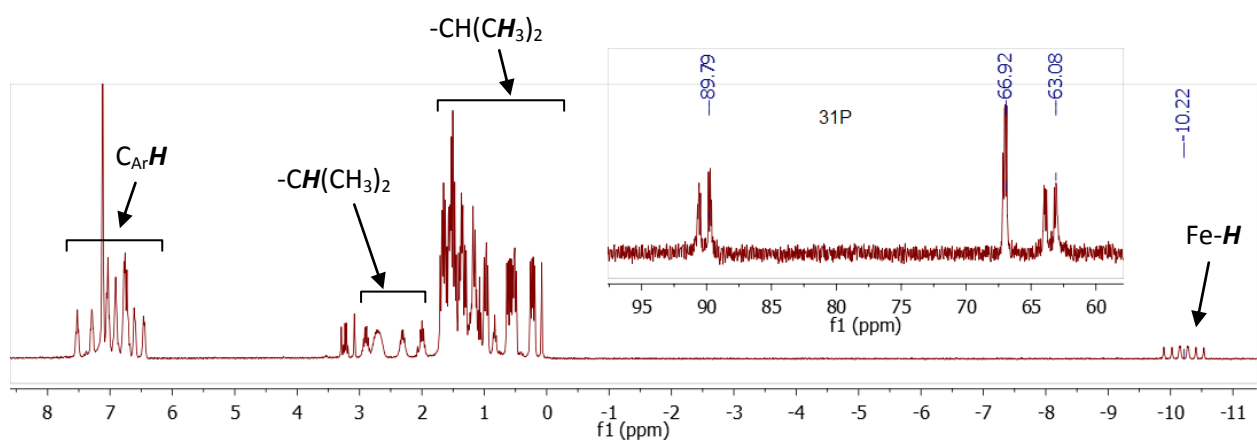

**Figure S13.**  $^1\text{H}$  NMR of **9** ( $\text{C}_6\text{D}_6$ , 300 MHz) with inset showing  $^{31}\text{P}$  NMR.

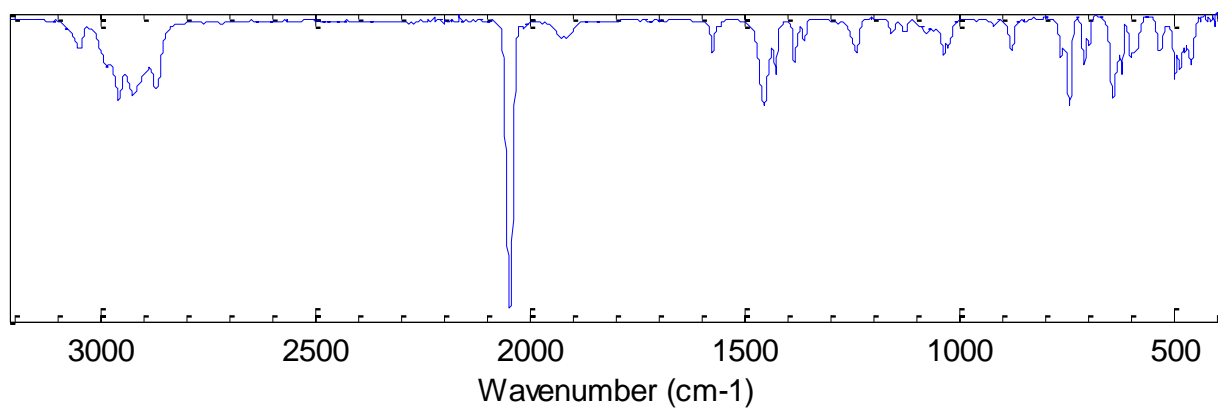

**Figure S14.** IR (thin film deposited from benzene) of **9**;  $\nu(\text{NN}) = 2046\text{ cm}^{-1}$ ;  $\nu(\text{FeH}) = 1920\text{ cm}^{-1}$

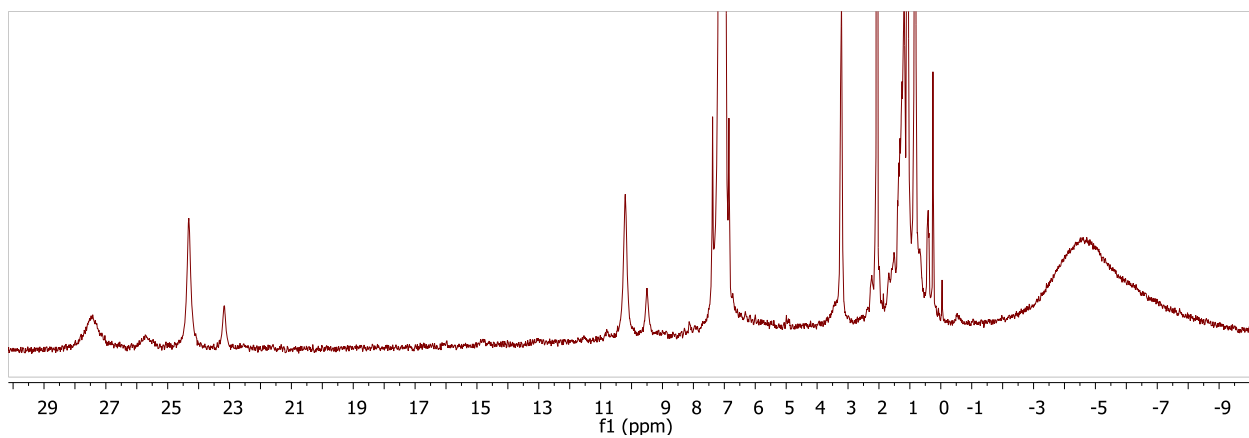

**Figure S15.**  $^1\text{H}$  NMR of **8** ( $\text{C}_6\text{D}_6$ , 300 MHz), unpurified, generated by reduction of  $\text{CP3HFeBr}_2$  with isopropyl magnesium chloride in toluene. For unknown reasons the reaction appears to yield a mixture of two closely related paramagnetic species.

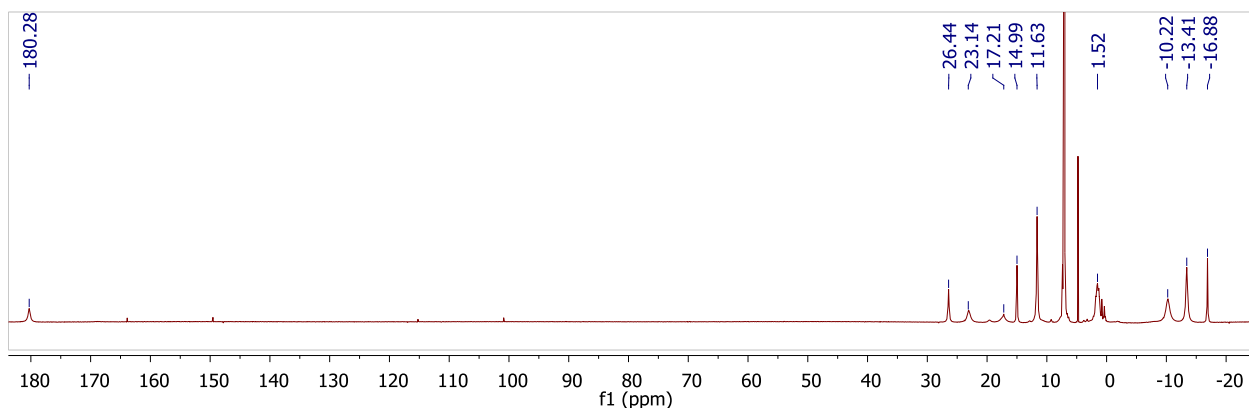

**Figure S16.**  $^1\text{H}$  NMR of **10** ( $\text{C}_6\text{D}_6$ , 300 MHz)



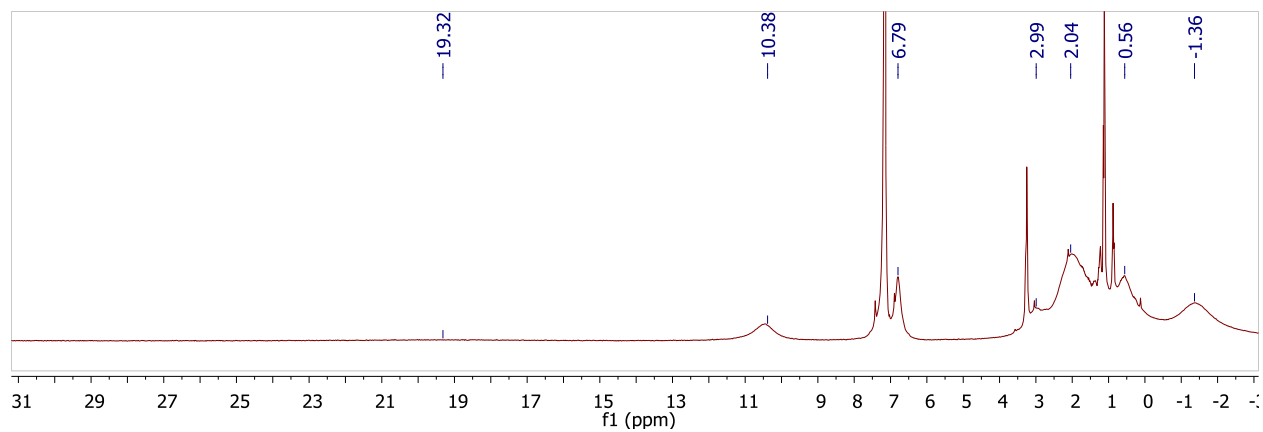

**Figure S17.**  $^1\text{H}$  NMR of **11** ( $\text{C}_6\text{D}_6$ , 300 MHz).

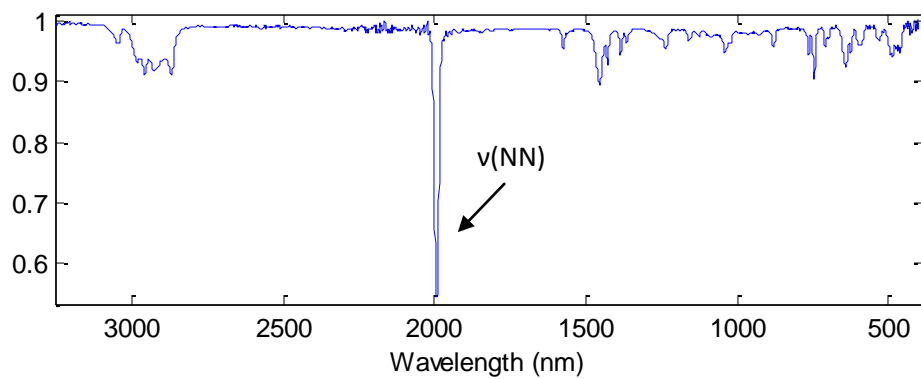

**Figure S18.** IR (thin film deposited from benzene) of **11**.  $\nu(\text{NN}) = 1992 \text{ cm}^{-1}$ .

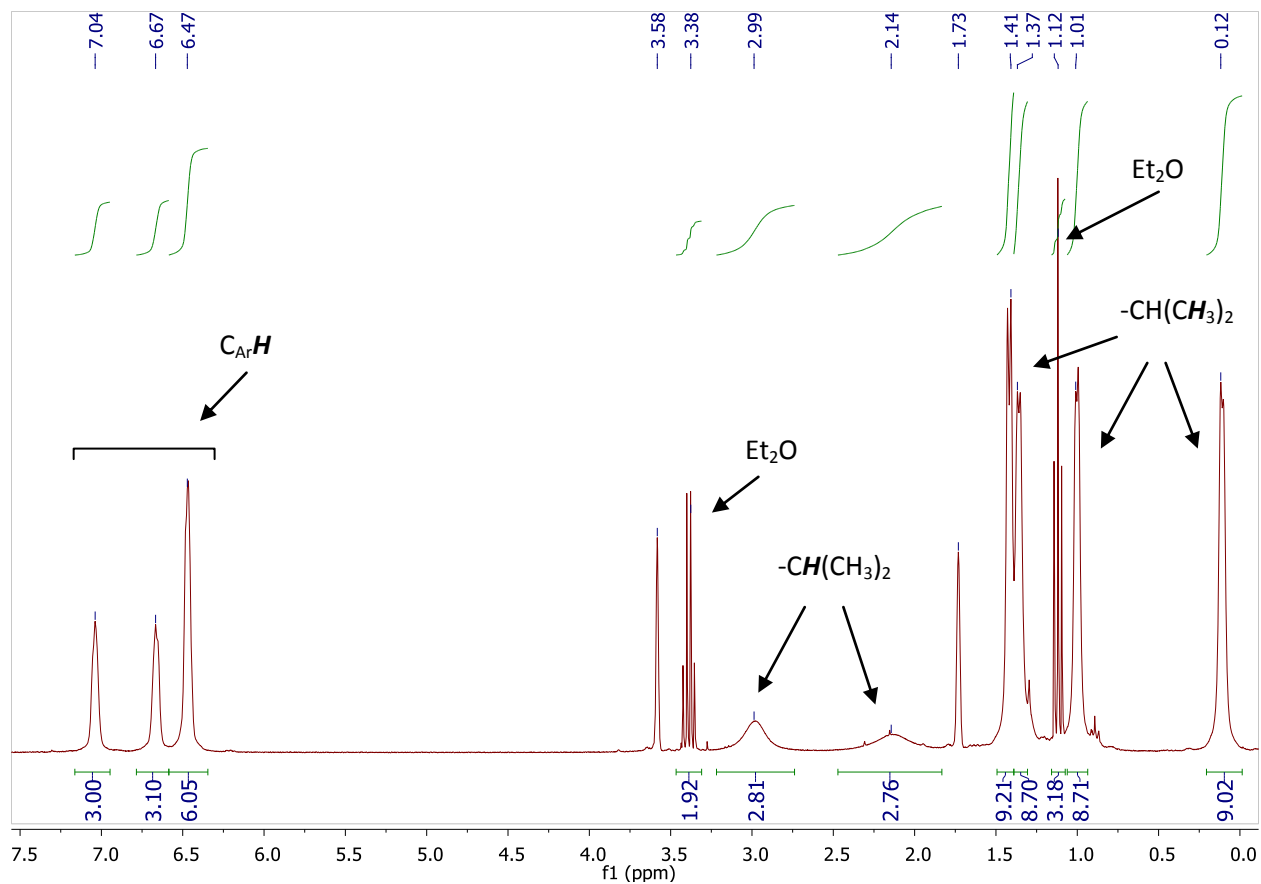

Figure S19.  $^1\text{H}$  NMR of **12** ( $d^8$ -THF, 300 MHz).

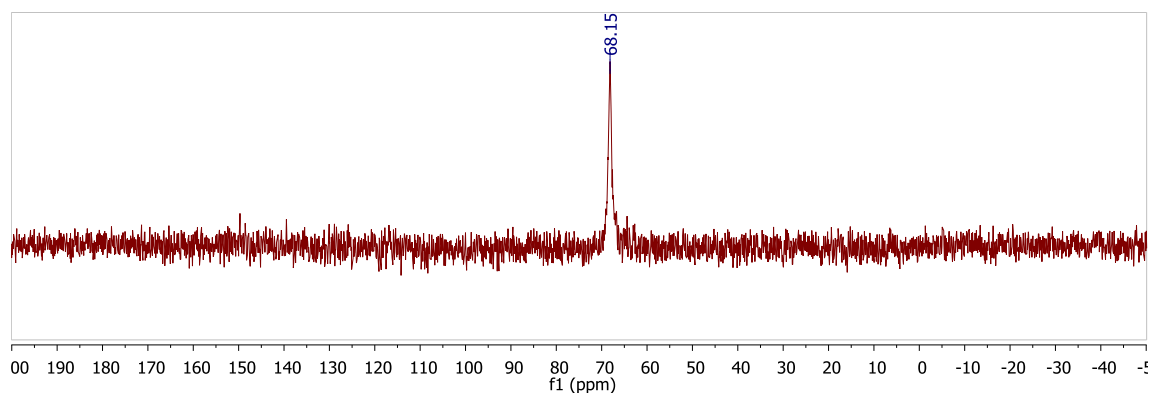

Figure S20.  $^{31}\text{P}$  NMR of **12**.

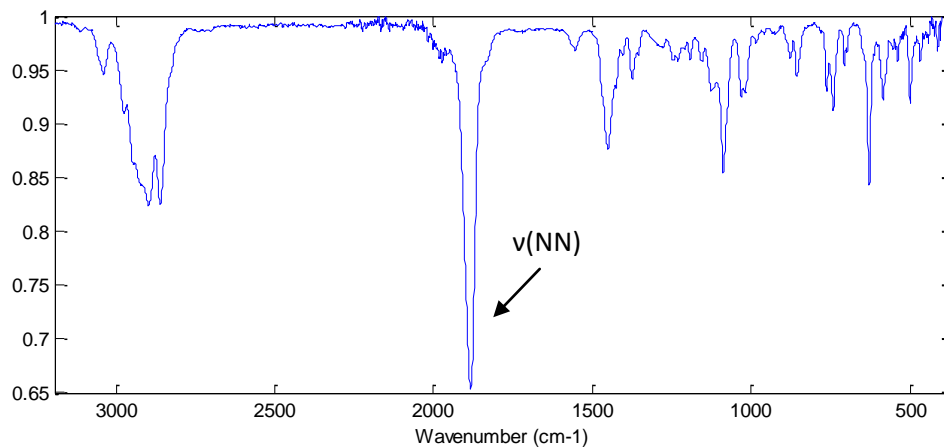

**Figure S21.** IR spectrum of **12** as a thin film deposited from dimethoxyethane.

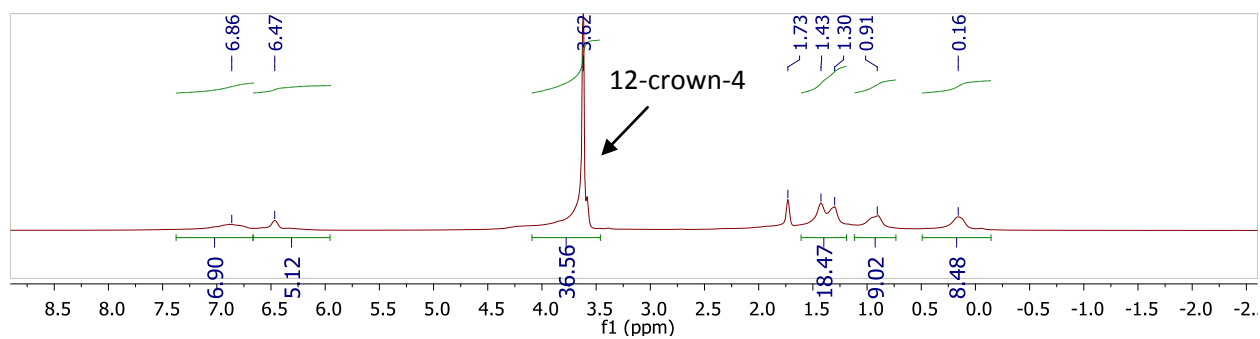

**Figure S22.** <sup>1</sup>H NMR of **12**[K(12-crown-4)<sub>2</sub>] in d<sub>8</sub>-THF.

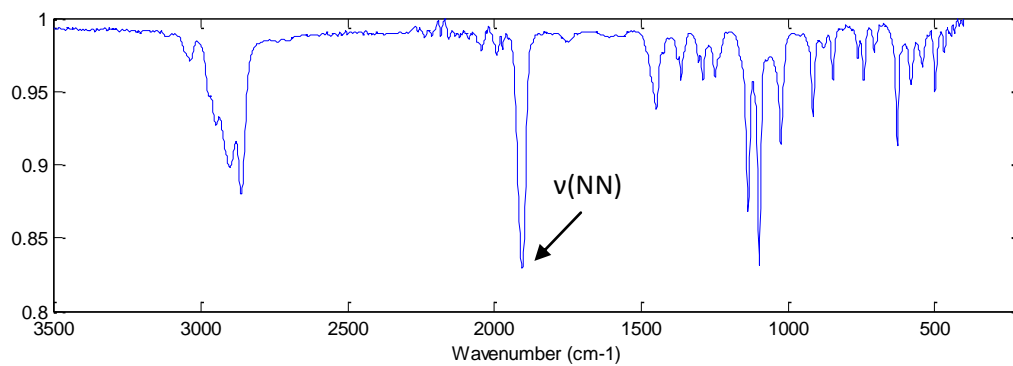

**Figure S23.** IR spectrum of **12**[K(12-crown-4)<sub>2</sub>] (thin film from THF).

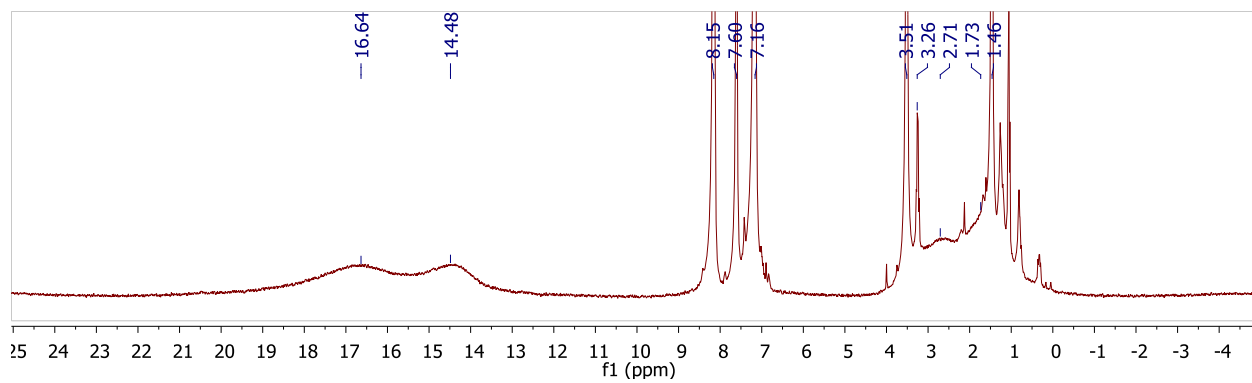

**Figure S24.**  $^1\text{H}$  NMR (4:1  $\text{C}_6\text{D}_6/\text{THF-}d_8$  under  $\text{N}_2$ , 300 MHz, 298 K) of **13**

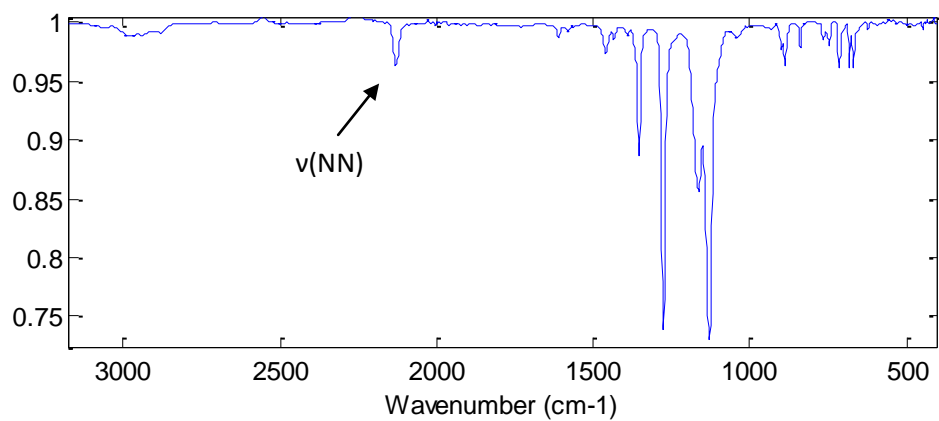

**Figure S25.** IR of **13** as a thin film deposited from THF.

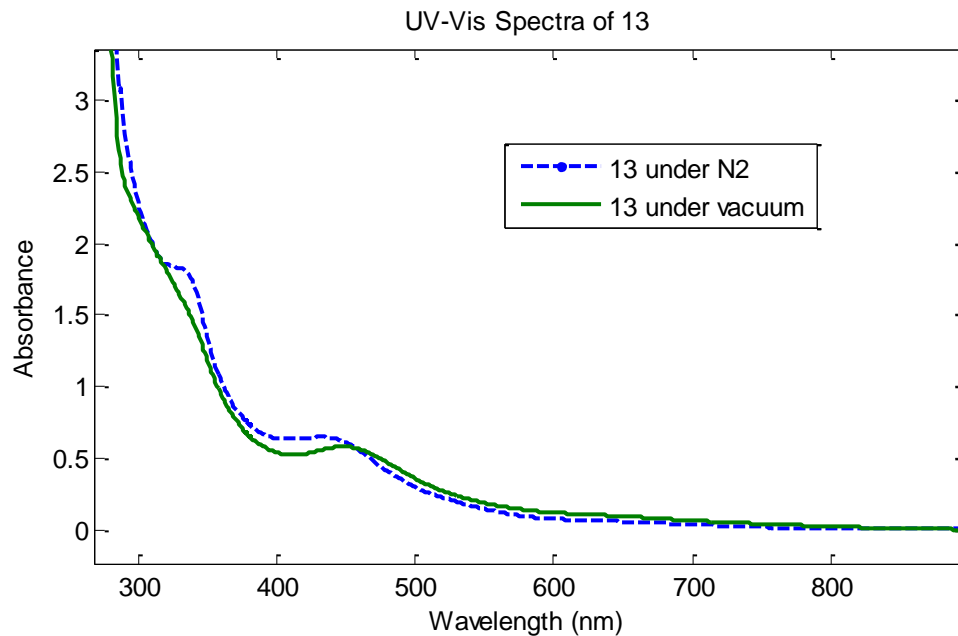

**Figure S26.** UV-Vis spectra of **13** under N<sub>2</sub> and under static vacuum (after three freeze-pump-thaw cycles). **13** is in a solution of 3:1 Et<sub>2</sub>O:THF at a concentration of 0.54 mM.

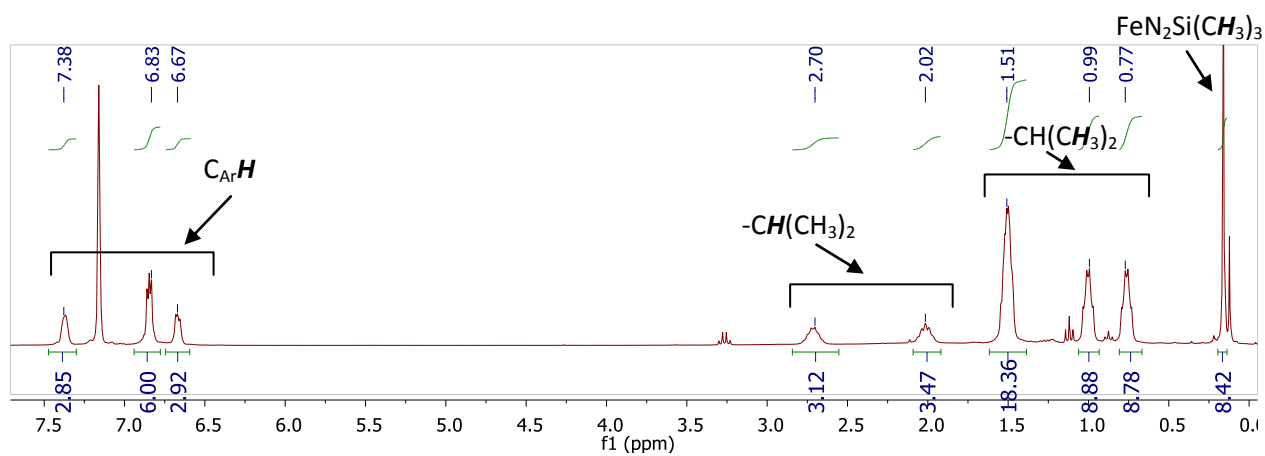

**Figure S27.** <sup>1</sup>H NMR of **14**, C<sub>6</sub>D<sub>6</sub>.

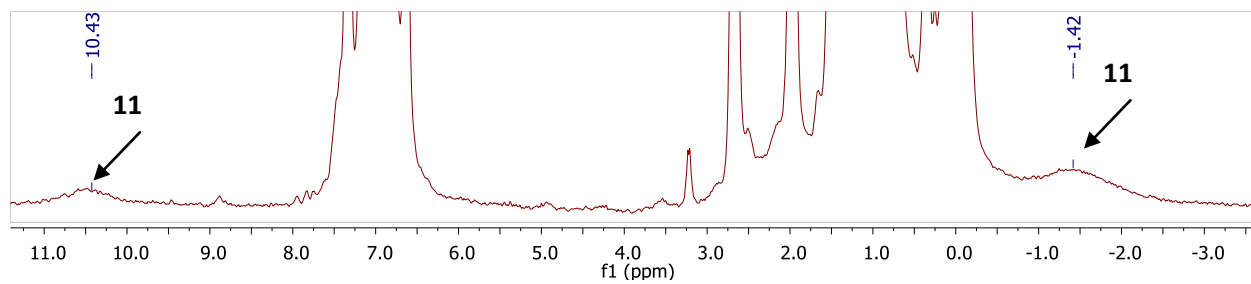

**Figure S28.**  $^1\text{H}$  NMR of **14**, showing paramagnetic regions magnified to show minor contamination with  $\text{CP}^{i\text{Pr}}_3\text{FeN}_2$  (**11**).

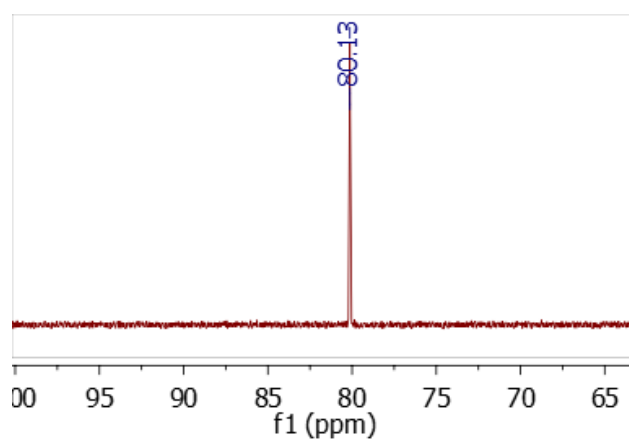

**Figure S29.**  $^{31}\text{P}$  NMR of **14** ( $\text{C}_6\text{D}_6$ ).

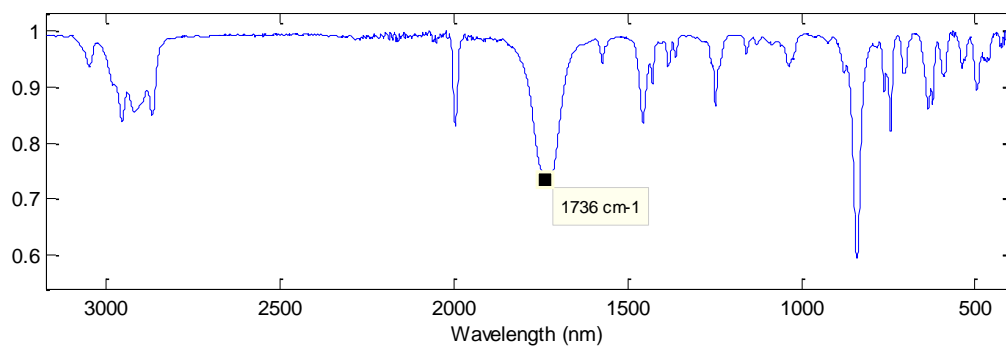

**Figure S30.** IR (thin-film from  $\text{C}_6\text{D}_6$ ) of **14**. Peak at  $1992\text{ cm}^{-1}$  is contamination by  $\text{CP}^{i\text{Pr}}_3\text{FeN}_2$ .

**Catalytic production of NH<sub>3</sub> using [(CP<sup>iPr</sup><sub>3</sub>)FeN<sub>2</sub>][K(Et<sub>2</sub>O)<sub>0.5</sub>]**

**Standard catalytic procedure with [(CP<sup>iPr</sup><sub>3</sub>)FeN<sub>2</sub>][K(Et<sub>2</sub>O)<sub>0.5</sub>] (12):** [(CP<sup>iPr</sup><sub>3</sub>)FeN<sub>2</sub>][K(Et<sub>2</sub>O)<sub>0.5</sub>] (1.9 mg, 0.0025 mmol) was suspended in Et<sub>2</sub>O (0.5 mL) in a small Schlenk tube equipped with a stir bar. This solution was cooled to -78 °C in a cold well inside of the glove box. A suspension of KC<sub>8</sub> (14 mg, 0.100 mmol) in Et<sub>2</sub>O (0.75 mL) was cooled to -78 °C and added to the reaction mixture with stirring. After five minutes, a similarly cooled solution of HBAR<sup>F</sup><sub>4</sub> · 2 Et<sub>2</sub>O (93 mg, 0.092 mmol) in Et<sub>2</sub>O (1.0 mL) was added to the suspension in one portion with rapid stirring. Any remaining acid was dissolved in cold Et<sub>2</sub>O (0.25 mL) and added subsequently, and the Schlenk tube was sealed. The reaction was allowed to stir for 60 minutes at -78 °C before being warmed to room temperature and stirred for 15 minutes.

*Results of Individual Runs*

| Run            | Absorbance   | Eq. NH <sub>3</sub> /Fe | % Yield based on H+ |
|----------------|--------------|-------------------------|---------------------|
| A <sup>1</sup> | 0.446        | 3.6                     | 28                  |
| B              | 0.466        | 4.3                     | 34                  |
| C              | 0.655        | 6.0                     | 47                  |
| D              | 0.476        | 4.4                     | 35                  |
| E              | 0.491        | 4.5                     | 36                  |
| F              | 0.451        | 4.2                     | 33                  |
| G              | 0.472        | 4.3                     | 34                  |
| H              | 0.587        | 5.4                     | 43                  |
| <b>Avg</b>     | 0.514 ± 0.08 | 4.6 ± 0.8               | 36 ± 6              |

<sup>1</sup>Used 2.2 mg (.0029 mmol) of catalyst; omitted from average absorbance.

Hydrazine was not detected in the catalytic runs using a standard UV-Vis quantification method<sup>2</sup>.

**Modified “acid-first” catalytic procedure with  $[(\text{C}^{\text{iPr}}_3)\text{FeN}_2][\text{K}(\text{Et}_2\text{O})_{0.5}]$  (**12**):**  $[(\text{C}^{\text{iPr}}_3)\text{FeN}_2][\text{K}(\text{Et}_2\text{O})_{0.5}]$  (1.9 mg, 0.0025 mmol) was dissolved in  $\text{Et}_2\text{O}$  (0.5 mL) in a 20 mL scintillation vial equipped with a stir bar. This dark brown solution was vigorously stirred and cooled to  $-78\text{ }^\circ\text{C}$  in a cold well inside of the glove box. A similarly cooled solution of  $\text{HBAr}^{\text{F}}_4 \cdot 2\text{Et}_2\text{O}$  (93 mg, 0.092 mmol) in  $\text{Et}_2\text{O}$  (1.5 mL) was added to the solution in one portion with rapid stirring. Any remaining acid was dissolved in cold  $\text{Et}_2\text{O}$  (0.25 mL) and added subsequently. The reaction mixture turned light orange upon addition of acid and the resulting solution was allowed to stir for 5 minutes before being transferred into a pre-cooled Schlenk tube equipped with a stirbar. The original reaction vial was washed with cold  $\text{Et}_2\text{O}$  (0.25 mL) which was subsequently transferred to the Schlenk tube. Solid  $\text{KC}_8$  (14 mg, 0.100 mmol) was suspended in cold  $\text{Et}_2\text{O}$  (0.75 mL) and added dropwise to the rapidly stirred solution in the Schlenk tube which was then tightly sealed. The reaction was allowed to stir for 60 minutes at  $-78\text{ }^\circ\text{C}$  before being warmed to room temperature and stirred for 15 minutes.

*Results of individual runs*

| Run            | Absorbance       | Eq. $\text{NH}_3/\text{Fe}$ | % Yield based on $\text{H}_2$ |
|----------------|------------------|-----------------------------|-------------------------------|
| I <sup>1</sup> | 0.375            | 3.0                         | 24                            |
| J              | 0.483            | 4.3                         | 34                            |
| K              | 0.484            | 4.4                         | 35                            |
| M              | 0.407            | 3.8                         | 30                            |
| Avg.           | $0.458 \pm 0.04$ | $3.8 \pm 0.6$               | $30 \pm 5$                    |

<sup>1</sup>Used 2.2 mg (.0029 mmol) of catalyst; omitted from average absorbance.

<sup>2</sup> Watt, G.W.; Chrisp, J.D. *Anal. Chem.* **1952**, *24*, 2006.



**Standard catalytic procedure with [(TPB)FeN<sub>2</sub>][Na(12-c-4)<sub>2</sub>]:** [(TPB)FeN<sub>2</sub>][Na(12-c-4)<sub>2</sub>] (2.0 mg, 0.002 mmol) was suspended in Et<sub>2</sub>O (0.5 mL) in a small Schlenk tube equipped with a stir bar. This solution was cooled to -78 °C in a cold well inside of the glove box. A suspension of KC<sub>8</sub> (14 mg, 0.100 mmol) in Et<sub>2</sub>O (0.75 mL) was cooled to -78 °C and added to the reaction mixture with stirring. After five minutes, a similarly cooled solution of HBAR<sup>F</sup><sub>4</sub> · 2 Et<sub>2</sub>O (93 mg, 0.092 mmol) in Et<sub>2</sub>O (1.0 mL) was added to the suspension in one portion with rapid stirring. Any remaining acid was dissolved in cold Et<sub>2</sub>O (0.25 mL) and added subsequently, and the Schlenk tube was sealed. The reaction was allowed to stir for 60 minutes at -78 °C before being warmed to room temperature and stirred for 15 minutes.

*Results of Individual Runs*

| Run  | Absorbance   | Eq. NH <sub>3</sub> /Fe | % Yield based on H+ |
|------|--------------|-------------------------|---------------------|
| N    | 0.528        | 6.1                     | 38                  |
| O    | 0.422        | 3.9                     | 24                  |
| Avg. | 0.475 ± 0.05 | 5.0 ± 1.1               | 31 ± 7              |

**Standard catalytic procedure with [(CP<sup>iPr</sup><sub>3</sub>)FeN<sub>2</sub>][K(12-c-4)<sub>2</sub>] (12[K(12-crown-4)<sub>2</sub>]):** [(CP<sup>iPr</sup><sub>3</sub>)FeN<sub>2</sub>][K(12-c-4)<sub>2</sub>] (2.0 mg, 0.002 mmol) was suspended in Et<sub>2</sub>O (0.5 mL) in a small Schlenk tube equipped with a stir bar. This solution was cooled to -78 °C in a cold well inside of the glove box. A suspension of KC<sub>8</sub> (14 mg, 0.100 mmol) in Et<sub>2</sub>O (0.75 mL) was cooled to -78 °C and added to the reaction mixture with stirring. After five minutes, a similarly cooled solution of HBAR<sup>F</sup><sub>4</sub> · 2 Et<sub>2</sub>O (93 mg, 0.092 mmol) in Et<sub>2</sub>O (1.0 mL) was added to the suspension in one portion with rapid stirring. Any remaining acid was dissolved in cold Et<sub>2</sub>O (0.25 mL) and added subsequently, and the Schlenk tube was sealed. The reaction was allowed to stir for 60 minutes at -78 °C before being warmed to room temperature and stirred for 15 minutes.

*Results of Individual Runs*

| Run            | Absorbance    | Eq. NH <sub>3</sub> /Fe | % Yield based on H+ |
|----------------|---------------|-------------------------|---------------------|
| P              | 0.327         | 3.7                     | 23                  |
| Q              | 0.328         | 3.7                     | 23                  |
| R <sup>1</sup> | 0.344         | 3.1                     | 24                  |
| Avg.           | 0.328 ± 0.001 | 3.5 ± 0.3               | 23 ± 0.3            |

<sup>1</sup> Used 2.5 mg (.0025 mmol) of catalyst; omitted from average absorbance.

**Standard catalytic procedure with [(SiP<sup>iPr</sup><sub>3</sub>)FeN<sub>2</sub>][Na(12-c-4)<sub>2</sub>]:** [(SiP<sup>iPr</sup><sub>3</sub>)FeN<sub>2</sub>][Na(12-c-4)<sub>2</sub>] (2.0 mg, 0.002 mmol) was suspended in Et<sub>2</sub>O (0.5 mL) in a small Schlenk tube equipped with a stir bar. This solution was cooled to -78 °C in a cold well inside of the glove box. A suspension of KC<sub>8</sub> (14 mg, 0.100 mmol) in Et<sub>2</sub>O (0.75 mL) was cooled to -78 °C and added to the reaction mixture with stirring. After five minutes, a similarly cooled solution of HBAr<sup>F</sup><sub>4</sub> · 2 Et<sub>2</sub>O (93 mg, 0.092 mmol) in Et<sub>2</sub>O (1.0 mL) was added to the suspension in one portion with rapid stirring. Any remaining acid was dissolved in cold Et<sub>2</sub>O (0.25 mL) and added subsequently, and the Schlenk tube was sealed. The reaction was allowed to stir for 60 minutes at -78 °C before being warmed to room temperature and stirred for 15 minutes.

#### *Results of Individual Runs*

| Run  | Absorbance   | Eq. NH <sub>3</sub> /Fe | % Yield based on H+ |
|------|--------------|-------------------------|---------------------|
| S    | 0.109        | 1.2                     | 8                   |
| T    | 0.040        | 0.4                     | 3                   |
| Avg. | 0.075 ± 0.03 | 0.8 ± 0.4               | 5 ± 3               |

**Identification of H<sub>2</sub> in a standard catalytic run.** A catalytic run was performed with 0.0025 mmol of **12** according to the standard procedure. Prior to the vacuum transfer of volatiles, the solutions inside of

the Schlenk tubes were frozen. The ground glass joint of the Schlenk tube was then sealed with a rubber septum and the head space between the Teflon stopcock of the Schlenk tube and the septum was evacuated. This head space was left under static vacuum and the Teflon stopcock of the reaction vessel was opened after which a 10 mL aliquot of the headspace was sampled through the septum *via* a gas-tight syringe. This sample was then analyzed for hydrogen with an Agilent 7890A gas chromatograph using a thermal conductivity detector. 45% yield of H<sub>2</sub> relative to H<sup>+</sup> was quantified.

**IR spectral analysis of addition of 12 equiv. of KC<sub>8</sub>, followed by 10 equiv of HBAR<sup>F</sup><sub>4</sub> · 2 Et<sub>2</sub>O to**

**[(CP<sup>iPr</sup><sub>3</sub>)FeN<sub>2</sub>][K(Et<sub>2</sub>O)<sub>0.5</sub>].** A 20 mL scintillation vial was charged with a stir bar and [(CP<sup>iPr</sup><sub>3</sub>)FeN<sub>2</sub>][K(Et<sub>2</sub>O)<sub>0.5</sub>] (7.6 mg, 0.0101 mmol). In a separate vial, HBAR<sup>F</sup><sub>4</sub> · 2 Et<sub>2</sub>O (75 mg, 0.074 mmol) was dissolved in Et<sub>2</sub>O (1 mL). Finally, a third vial was prepared containing a suspension of potassium graphite (12 mg, 0.090 mmol) in Et<sub>2</sub>O (1 mL). All three vials were chilled in the cold well to -78 °C for 10 minutes. The suspension of KC<sub>8</sub> was quickly added to the stirring suspension of [(CP<sup>iPr</sup><sub>3</sub>)FeN<sub>2</sub>][K(Et<sub>2</sub>O)<sub>0.5</sub>]. After stirring for 5 minutes, HBAR<sup>F</sup><sub>4</sub> · 2 Et<sub>2</sub>O was added rapidly to the stirring reaction mixture. This solution was capped and stirred at -78 °C for 60 minutes and then brought to r.t. and stirred for 15 minutes. The resulting reaction mixture was concentrated to dryness, taken up in C<sub>6</sub>D<sub>6</sub>, and filtered through Celite, giving an orange solution which was analyzed by IR and NMR. By IR, the major species appeared to be (CP<sup>iPr</sup><sub>3</sub>)FeN<sub>2</sub> (**11**), and the presence of a smaller amount of (CP<sup>iPr</sup><sub>3</sub>)Fe(N<sub>2</sub>)(H) (**9**) was also apparent. By NMR, **11**, **9**, and (CP<sup>iPr</sup><sub>3</sub>)FeCl (**10**) were detected as well as an additional unidentified diamagnetic species present in small amounts. No uncoordinated (CP<sup>iPr</sup><sub>3</sub>)H ligand could be detected.

**IR spectral analysis of addition of 40 equiv. of KC<sub>8</sub>, followed by 38 equiv of HBAR<sup>F</sup><sub>4</sub> · 2 Et<sub>2</sub>O to**

**[(CP<sup>iPr</sup><sub>3</sub>)FeN<sub>2</sub>][K(Et<sub>2</sub>O)<sub>0.5</sub>].** A 20 mL scintillation vial was charged with a stir bar and [(CP<sup>iPr</sup><sub>3</sub>)FeN<sub>2</sub>][K(Et<sub>2</sub>O)<sub>0.5</sub>] (8.0 mg, 0.0106 mmol). In a separate vial, HBAR<sup>F</sup><sub>4</sub> · 2 Et<sub>2</sub>O (392 mg, 0.403 mmol) was dissolved in Et<sub>2</sub>O (1 mL). Finally, a third vial was prepared containing a suspension of potassium

graphite (59 mg, 0.424 mmol) in Et<sub>2</sub>O (1 mL). All three vials were chilled in the cold well to -78 °C for 10 minutes. The suspension of K<sub>2</sub>C<sub>8</sub> was quickly added to the stirring suspension of [(CP<sup>iPr</sup><sub>3</sub>)FeN<sub>2</sub>][K(Et<sub>2</sub>O)<sub>0.5</sub>]. After stirring for 5 minutes, HBAr<sup>F</sup><sub>4</sub> · 2 Et<sub>2</sub>O was added rapidly to the stirring reaction mixture. This solution was capped and stirred at -78 °C for 60 minutes and then brought to r.t. and stirred for 15 minutes. The resulting reaction mixture was concentrated to dryness, taken up in C<sub>6</sub>D<sub>6</sub>, and filtered through Celite, giving an orange solution which was analyzed by IR and NMR. By IR and NMR, the major species appeared to be (CP<sup>iPr</sup><sub>3</sub>)Fe(N<sub>2</sub>)(H) (**9**), and some (CP<sup>iPr</sup><sub>3</sub>)FeN<sub>2</sub> (**11**) was also present. No uncoordinated (CP<sup>iPr</sup><sub>3</sub>)H ligand could be detected.

In a separate experiment, the reaction was carried out as above, but after being allowed to stir at room temperature for 15 minutes the reaction mixture was filtered and to the filtrate was added an aliquot of a standard solution of 1,3,5-trimethoxybenzene (0.0106 mmol). The combined solution was concentrated to dryness, taken up in C<sub>6</sub>D<sub>6</sub>, filtered through Celite, and analyzed by IR and NMR. NMR integration (d1 = 10 sec) of the diamagnetic peaks shows approximately 70% yield of **9** relative to the starting catalyst (Figure S31).

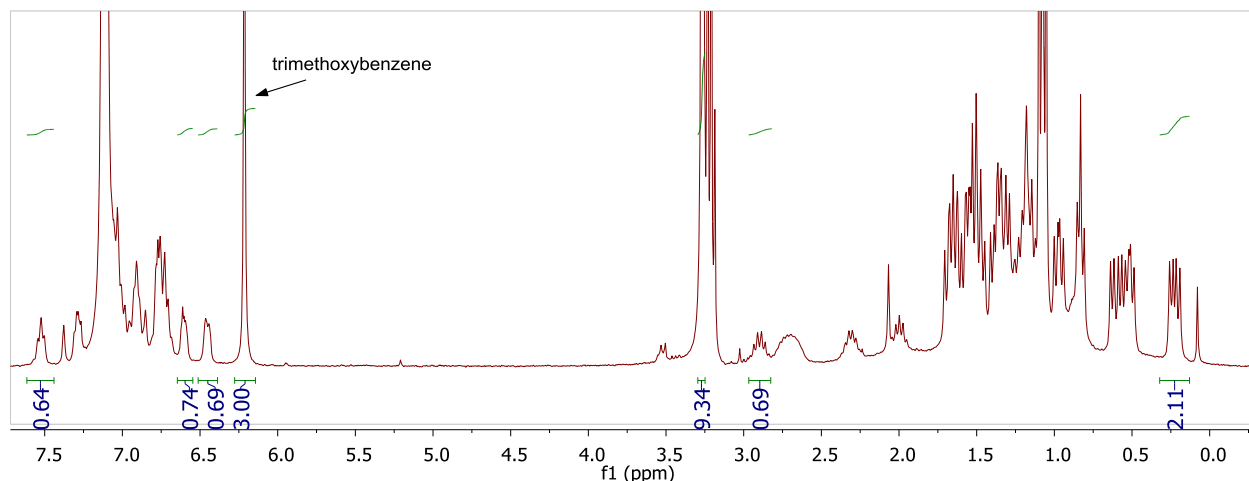

**Figure S31.** NMR of reaction mixture after catalysis with internal standard (1,3,5-trimethoxybenzene).

### Calibration Curves for NH<sub>3</sub> and N<sub>2</sub>H<sub>4</sub> Quantification

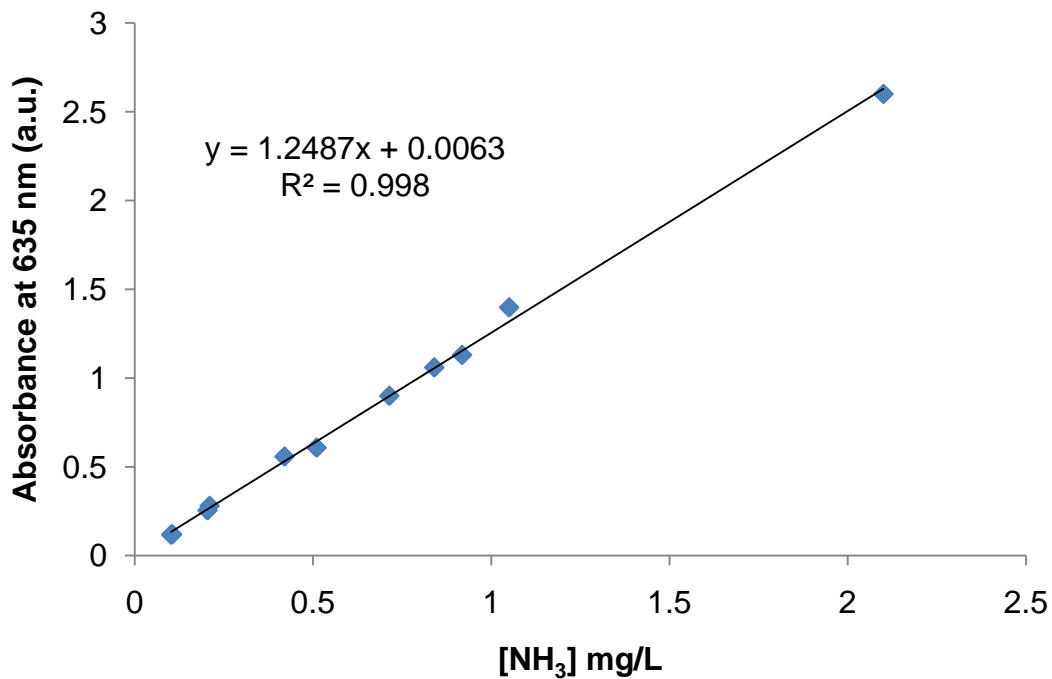

**Figure S32.** Calibration curve for NH<sub>3</sub> quantification *via* indophenol method.

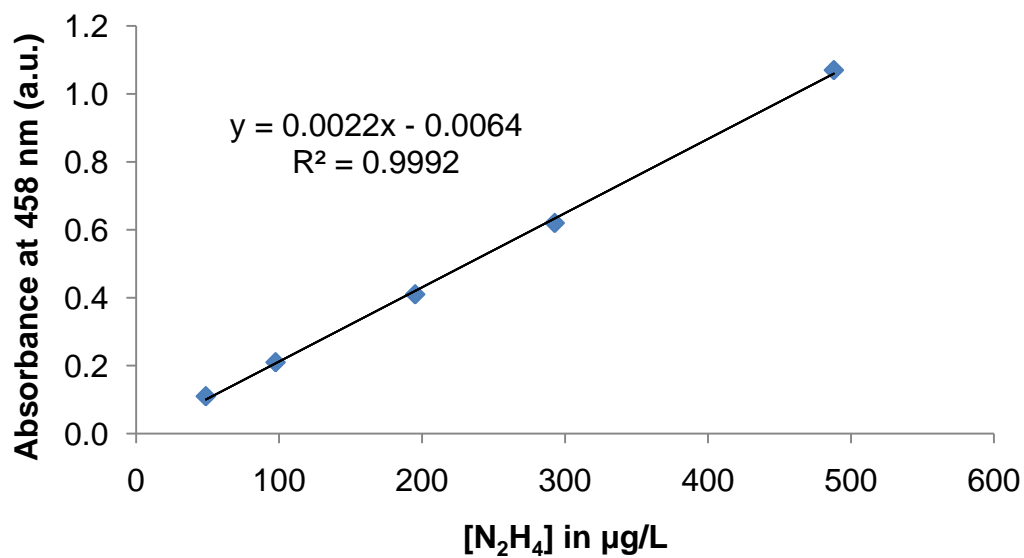

**Figure S33.** Calibration curve for UV-Vis quantification of hydrazine.

Curves were generated by creating solutions of  $[\text{NH}_4][\text{Cl}]$  and  $[\text{N}_2\text{H}_5][\text{HSO}_4]$  of known concentrations and then analyzing by the appropriate UV-Vis methodology (*vide supra*)

**Quantification of ammonia formed without added reductant.** A sample of  $\mathbf{12}[\text{K}(\text{Et}_2\text{O})_{0.5}]$  was dissolved in  $\text{Et}_2\text{O}$  (1 mL) and cooled to  $-78^\circ\text{C}$  in a Schlenk tube.  $\text{HBAr}^{\text{F}}_4 \cdot 2 \text{Et}_2\text{O}$  (10 equiv.) was dissolved in cold  $\text{Et}_2\text{O}$  (1 mL) and added in one portion with rapid stirring. The reaction mixture was stirred at  $-78^\circ\text{C}$  for 1 hour and then at room temperature for 20 minutes, and then subjected to the standard ammonia quantification procedure. One run using 0.0025 mmol of  $\mathbf{12}[\text{K}(\text{Et}_2\text{O})_{0.5}]$  gave  $<0.05$  equiv. of  $\text{NH}_3$  (below detection limits) while a second run using 0.005 mmol of  $\mathbf{12}[\text{K}(\text{Et}_2\text{O})_{0.5}]$  gave 0.06 equiv. of  $\text{NH}_3/\text{Fe}$ .

**Attempted catalysis with 9.**  $(\text{Cp}_3^{\text{iPr}})\text{Fe}(\text{N}_2)(\text{H})$  (1.7 mg, 0.002 mmol) was suspended in  $\text{Et}_2\text{O}$  (0.5 mL) in a small Schlenk tube equipped with a stir bar. This solution was cooled to  $-78^\circ\text{C}$  in a cold well inside of the glove box. A suspension of  $\text{KC}_8$  (14 mg, 0.100 mmol) in  $\text{Et}_2\text{O}$  (0.75 mL) was cooled to  $-78^\circ\text{C}$  and added to the reaction mixture with stirring. After five minutes, a similarly cooled solution of  $\text{HBAr}^{\text{F}}_4 \cdot 2 \text{Et}_2\text{O}$  (93 mg, 0.092 mmol) in  $\text{Et}_2\text{O}$  (1.0 mL) was added to the suspension in one portion with rapid stirring. Any remaining acid was dissolved in cold  $\text{Et}_2\text{O}$  (0.25 mL) and added subsequently, and the Schlenk tube was sealed. The reaction was allowed to stir for 60 minutes at  $-78^\circ\text{C}$  before being warmed to room temperature and stirred for 15 minutes. The reaction was subjected to the standard workup and ammonia detection procedure; no ammonia was detected.

**Attempted catalysis with  $[(\text{C}^{\text{SiPh}}\text{P}^{\text{Ph}})_3\text{FeN}_2][\text{K}(\text{benzo-15-crown-5})_2]$  :**  $[(\text{C}^{\text{SiPh}}\text{P}^{\text{Ph}})_3\text{FeN}_2][\text{K}(\text{benzo-15-crown-5})_2]$  (2.0 mg, 0.0020 mmol) was dissolved in  $\text{Et}_2\text{O}$  (0.5 mL) in a 20 mL scintillation vial equipped with a stir bar. This dark brown solution was vigorously stirred and cooled to  $-78^\circ\text{C}$  in a cold well inside of the glove box. A similarly cooled solution of  $\text{HBAr}^{\text{F}}_4 \cdot 2 \text{Et}_2\text{O}$  (93 mg, 0.092 mmol) in  $\text{Et}_2\text{O}$  (1.5 mL) was added to the solution in one portion with rapid stirring. Any remaining acid was dissolved in cold  $\text{Et}_2\text{O}$  (0.25 mL) and added subsequently. The reaction mixture was allowed to stir for 5 minutes before being

transferred into a pre-cooled Schlenk tube equipped with a stirbar. The original reaction vial was washed with cold Et<sub>2</sub>O (0.25 mL) which was subsequently transferred to the Schlenk tube. Solid KC<sub>8</sub> (14 mg, 0.100 mmol) was suspended in cold Et<sub>2</sub>O (0.75 mL) and added dropwise to the rapidly stirred solution in the Schlenk tube which was then tightly sealed. The reaction was allowed to stir for 60 minutes at -78 °C before being warmed to room temperature and stirred for 15 minutes. Ammonia was quantified via the standard method. Two trials were performed, giving 0.40 and 0.14 equiv. NH<sub>3</sub>/Fe.

## Crystal Structure Tables and Refinement Information

*Crystal data and structure refinement for [(CP<sup>iPr</sup><sub>3</sub>)H]FeI<sub>2</sub> (6)*

|                                   |                                                                                                            |
|-----------------------------------|------------------------------------------------------------------------------------------------------------|
| Empirical formula                 | C <sub>40.50</sub> H <sub>59</sub> FeI <sub>2</sub> P <sub>3</sub>                                         |
| Formula weight                    | 948.44                                                                                                     |
| Temperature                       | 296(2) K                                                                                                   |
| Wavelength                        | 0.71073 Å                                                                                                  |
| Crystal system                    | Monoclinic                                                                                                 |
| Space group                       | C2/c                                                                                                       |
| Unit cell dimensions              | a = 39.338(2) Å      α = 90°.<br>b = 12.1860(7) Å      β = 111.327(2)°.<br>c = 18.6670(11) Å      γ = 90°. |
| Volume                            | 8335.6(8) Å <sup>3</sup>                                                                                   |
| Z                                 | 8                                                                                                          |
| Density (calculated)              | 1.512 Mg/m <sup>3</sup>                                                                                    |
| Absorption coefficient            | 1.985 mm <sup>-1</sup>                                                                                     |
| F(000)                            | 3832                                                                                                       |
| Theta range for data collection   | 1.76 to 26.37°.                                                                                            |
| Index ranges                      | -49 ≤ h ≤ 49, -15 ≤ k ≤ 15, -23 ≤ l ≤ 23                                                                   |
| Reflections collected             | 117932                                                                                                     |
| Independent reflections           | 8536 [R(int) = 0.0714]                                                                                     |
| Completeness to theta = 26.37°    | 100.0 %                                                                                                    |
| Absorption correction             | Semi-empirical from equivalents                                                                            |
| Max. and min. transmission        | .7460 and .6679                                                                                            |
| Refinement method                 | Full-matrix least-squares on F <sup>2</sup>                                                                |
| Data / restraints / parameters    | 8536 / 464 / 433                                                                                           |
| Goodness-of-fit on F <sup>2</sup> | 1.037                                                                                                      |
| Final R indices [I > 2σ(I)]       | R1 = 0.0256, wR2 = 0.0462                                                                                  |
| R indices (all data)              | R1 = 0.0397, wR2 = 0.0501                                                                                  |
| Largest diff. peak and hole       | 0.491 and -0.498 e.Å <sup>-3</sup>                                                                         |

One solvent molecule is present in the structure of **6**, a toluene molecule which was modeled as disordered over a two-fold special position. Additionally, one isopropyl group on the ligand was refined as a disorder over two positions in a 76:24 ratio.



*Crystal data and structure refinement for [(CP<sup>iPr</sup><sub>3</sub>)H]FeBr (8)*

|                                   |                                                                                                                                                             |
|-----------------------------------|-------------------------------------------------------------------------------------------------------------------------------------------------------------|
| Empirical formula                 | C <sub>43</sub> H <sub>61</sub> Br Fe P <sub>3</sub>                                                                                                        |
| Formula weight                    | 814.48                                                                                                                                                      |
| Temperature                       | 100(2) K                                                                                                                                                    |
| Wavelength                        | 0.71073 Å                                                                                                                                                   |
| Crystal system                    | Monoclinic                                                                                                                                                  |
| Space group                       | P2(1)/c                                                                                                                                                     |
| Unit cell dimensions              | a = 12.5154(8) Å                      α = 90°.<br>b = 15.3220(10) Å                      β = 92.849(3)°.<br>c = 20.9097(10) Å                      γ = 90°. |
| Volume                            | 4004.7(4) Å <sup>3</sup>                                                                                                                                    |
| Z                                 | 4                                                                                                                                                           |
| Density (calculated)              | 1.351 Mg/m <sup>3</sup>                                                                                                                                     |
| Absorption coefficient            | 1.525 mm <sup>-1</sup>                                                                                                                                      |
| F(000)                            | 1684                                                                                                                                                        |
| Crystal size                      | 0.30 x 0.06 x 0.02 mm <sup>3</sup>                                                                                                                          |
| Theta range for data collection   | 1.63 to 27.89°.                                                                                                                                             |
| Index ranges                      | -16 ≤ h ≤ 16, -19 ≤ k ≤ 19, -27 ≤ l ≤ 26                                                                                                                    |
| Reflections collected             | 61095                                                                                                                                                       |
| Independent reflections           | 9120 [R(int) = 0.1687]                                                                                                                                      |
| Completeness to theta = 25.00°    | 100.0 %                                                                                                                                                     |
| Absorption correction             | Semi-empirical from equivalents                                                                                                                             |
| Max. and min. transmission        | 0.9701 and 0.6576                                                                                                                                           |
| Refinement method                 | Full-matrix least-squares on F <sup>2</sup>                                                                                                                 |
| Data / restraints / parameters    | 9120 / 0 / 427                                                                                                                                              |
| Goodness-of-fit on F <sup>2</sup> | 0.970                                                                                                                                                       |
| Final R indices [I > 2σ(I)]       | R <sub>1</sub> = 0.0618, wR <sub>2</sub> = 0.1127                                                                                                           |
| R indices (all data)              | R <sub>1</sub> = 0.1742, wR <sub>2</sub> = 0.1545                                                                                                           |
| Largest diff. peak and hole       | 1.110 and -0.862 e.Å <sup>-3</sup>                                                                                                                          |

The structure of **8** includes one benzene molecule per asymmetric unit.

*Crystal data and structure refinement for (CP<sup>iPr</sup><sub>3</sub>)Fe(N<sub>2</sub>)(H) (9)*

|                                   |                                                                                                    |
|-----------------------------------|----------------------------------------------------------------------------------------------------|
| Empirical formula                 | C <sub>37</sub> H <sub>55</sub> Fe N <sub>2</sub> P <sub>3</sub>                                   |
| Formula weight                    | 676.59                                                                                             |
| Temperature                       | 296(2) K                                                                                           |
| Wavelength                        | 0.71073 Å                                                                                          |
| Crystal system                    | Orthorhombic                                                                                       |
| Space group                       | P2(1)2(1)2(1)                                                                                      |
| Unit cell dimensions              | a = 10.8051(3) Å      α = 90°.<br>b = 15.4905(5) Å      β = 90°.<br>c = 20.7380(7) Å      γ = 90°. |
| Volume                            | 3471.05(19) Å <sup>3</sup>                                                                         |
| Z                                 | 4                                                                                                  |
| Density (calculated)              | 1.295 Mg/m <sup>3</sup>                                                                            |
| Absorption coefficient            | 0.601 mm <sup>-1</sup>                                                                             |
| F(000)                            | 1448                                                                                               |
| Crystal size                      | 0.50 x 0.49 x 0.38 mm <sup>3</sup>                                                                 |
| Theta range for data collection   | 1.96 to 25.00°.                                                                                    |
| Index ranges                      | -12 ≤ h ≤ 12, -18 ≤ k ≤ 18, -24 ≤ l ≤ 24                                                           |
| Reflections collected             | 65697                                                                                              |
| Independent reflections           | 6113 [R(int) = 0.0393]                                                                             |
| Completeness to theta = 25.00°    | 99.9 %                                                                                             |
| Absorption correction             | Semi-empirical from equivalents                                                                    |
| Max. and min. transmission        | 0.8037 and 0.7530                                                                                  |
| Refinement method                 | Full-matrix least-squares on F <sup>2</sup>                                                        |
| Data / restraints / parameters    | 6113 / 341 / 398                                                                                   |
| Goodness-of-fit on F <sup>2</sup> | 1.059                                                                                              |
| Final R indices [I > 2σ(I)]       | R1 = 0.0304, wR2 = 0.0776                                                                          |
| R indices (all data)              | R1 = 0.0306, wR2 = 0.0777                                                                          |
| Absolute structure parameter      | 0.099(12)                                                                                          |
| Largest diff. peak and hole       | 1.783 and -0.639 e.Å <sup>-3</sup>                                                                 |

*Crystal data and structure refinement for (CP<sup>Pr</sup><sub>3</sub>)FeN<sub>2</sub> (II)*

|                                   |                                                                                                      |
|-----------------------------------|------------------------------------------------------------------------------------------------------|
| Empirical formula                 | C <sub>37</sub> H <sub>54</sub> FeN <sub>2</sub> P <sub>3</sub>                                      |
| Formula weight                    | 675.58                                                                                               |
| Temperature                       | 100(2) K                                                                                             |
| Wavelength                        | 0.71073 Å                                                                                            |
| Crystal system                    | Trigonal                                                                                             |
| Space group                       | R-3                                                                                                  |
| Unit cell dimensions              | a = 19.4069(5) Å      α = 90°.<br>b = 19.4069(5) Å      β = 90°.<br>c = 47.9751(17) Å      γ = 120°. |
| Volume                            | 15648.0(8) Å <sup>3</sup>                                                                            |
| Z                                 | 18                                                                                                   |
| Density (calculated)              | 1.290 Mg/m <sup>3</sup>                                                                              |
| Absorption coefficient            | 0.600 mm <sup>-1</sup>                                                                               |
| F(000)                            | 6498                                                                                                 |
| Theta range for data collection   | 1.27 to 25.03°.                                                                                      |
| Index ranges                      | -23 ≤ h ≤ 11, -23 ≤ k ≤ 23, -57 ≤ l ≤ 57                                                             |
| Reflections collected             | 12326                                                                                                |
| Independent reflections           | 12326 [R(int) = 0.0000]                                                                              |
| Completeness to theta = 25.03°    | 100.0 %                                                                                              |
| Absorption correction             | Semi-empirical from equivalents                                                                      |
| Refinement method                 | Full-matrix least-squares on F <sup>2</sup>                                                          |
| Data / restraints / parameters    | 12326 / 335 / 389                                                                                    |
| Goodness-of-fit on F <sup>2</sup> | 1.106                                                                                                |
| Final R indices [I > 2σ(I)]       | R1 = 0.0624, wR2 = 0.1624                                                                            |
| R indices (all data)              | R1 = 0.0655, wR2 = 0.1672                                                                            |
| Largest diff. peak and hole       | 2.593 and -0.891 e.Å <sup>-3</sup>                                                                   |

The refinement of the crystal structure of **11** used SHELX HKLF 5 refinement to treat the presence of a non-merohedral twin accounting for 20% of the observed reflections.

*Crystal data and structure refinement for [(CP<sup>Pr</sup><sub>3</sub>)FeN<sub>2</sub>][K(Et<sub>2</sub>O)<sub>3</sub>] (12)*

|                                   |                                                                                   |                 |
|-----------------------------------|-----------------------------------------------------------------------------------|-----------------|
| Empirical formula                 | C <sub>49</sub> H <sub>84</sub> Fe K N <sub>2</sub> O <sub>3</sub> P <sub>3</sub> |                 |
| Formula weight                    | 937.04                                                                            |                 |
| Temperature                       | 296(2) K                                                                          |                 |
| Wavelength                        | 0.71073 Å                                                                         |                 |
| Crystal system                    | Monoclinic                                                                        |                 |
| Space group                       | Cc                                                                                |                 |
| Unit cell dimensions              | a = 10.9229(4) Å                                                                  | α = 90°.        |
|                                   | b = 26.9376(10) Å                                                                 | β = 94.663(2)°. |
|                                   | c = 17.6054(7) Å                                                                  | γ = 90°.        |
| Volume                            | 5163.0(3) Å <sup>3</sup>                                                          |                 |
| Z                                 | 4                                                                                 |                 |
| Absorption coefficient            | 0.505 mm <sup>-1</sup>                                                            |                 |
| F(000)                            | 2024                                                                              |                 |
| Theta range for data collection   | 1.91 to 35.46°.                                                                   |                 |
| Index ranges                      | -17 ≤ h ≤ 17, -38 ≤ k ≤ 43, -28 ≤ l ≤ 28                                          |                 |
| Reflections collected             | 77464                                                                             |                 |
| Independent reflections           | 21119 [R(int) = 0.0624]                                                           |                 |
| Completeness to theta = 35.46°    | 94.5 %                                                                            |                 |
| Absorption correction             | Semi-empirical from equivalents                                                   |                 |
| Max. and min. transmission        | 0.9701 and 0.6576                                                                 |                 |
| Refinement method                 | Full-matrix least-squares on F <sup>2</sup>                                       |                 |
| Data / restraints / parameters    | 21119 / 2 / 544                                                                   |                 |
| Goodness-of-fit on F <sup>2</sup> | 1.008                                                                             |                 |
| Final R indices [I > 2σ(I)]       | R1 = 0.0438, wR2 = 0.0843                                                         |                 |
| R indices (all data)              | R1 = 0.0755, wR2 = 0.0949                                                         |                 |
| Absolute structure parameter      | 0.130(8)                                                                          |                 |
| Largest diff. peak and hole       | 0.902 and -0.524 e.Å <sup>-3</sup>                                                |                 |

*Crystal data and structure refinement for [(CP<sup>iPr</sup><sub>3</sub>)FeN<sub>2</sub>][BAR<sub>4</sub><sup>F</sup>] (13)*

|                                   |                                                                                                          |
|-----------------------------------|----------------------------------------------------------------------------------------------------------|
| Empirical formula                 | C <sub>69</sub> H <sub>66</sub> B Cl <sub>0.12</sub> F <sub>24</sub> Fe N <sub>1.77</sub> P <sub>3</sub> |
| Formula weight                    | 1539.84                                                                                                  |
| Temperature                       | 296(2) K                                                                                                 |
| Wavelength                        | 0.71073 Å                                                                                                |
| Crystal system                    | Orthorhombic                                                                                             |
| Space group                       | Pbca                                                                                                     |
| Unit cell dimensions              | a = 19.7846(11) Å      α = 90°.<br>b = 25.8800(14) Å      β = 90°.<br>c = 26.6463(13) Å      γ = 90°.    |
| Volume                            | 13643.6(13) Å <sup>3</sup>                                                                               |
| Z                                 | 8                                                                                                        |
| Density (calculated)              | 1.499 Mg/m <sup>3</sup>                                                                                  |
| Absorption coefficient            | 0.405 mm <sup>-1</sup>                                                                                   |
| F(000)                            | 6291                                                                                                     |
| Theta range for data collection   | 1.50 to 30.53°.                                                                                          |
| Index ranges                      | -28 ≤ h ≤ 28, -36 ≤ k ≤ 36, -38 ≤ l ≤ 36                                                                 |
| Reflections collected             | 224578                                                                                                   |
| Independent reflections           | 20858 [R(int) = 0.1311]                                                                                  |
| Completeness to theta = 30.53°    | 99.9 %                                                                                                   |
| Absorption correction             | Semi-empirical from equivalents                                                                          |
| Max. and min. transmission        | 0.9701 and 0.6576                                                                                        |
| Refinement method                 | Full-matrix least-squares on F <sup>2</sup>                                                              |
| Data / restraints / parameters    | 20858 / 1048 / 946                                                                                       |
| Goodness-of-fit on F <sup>2</sup> | 1.118                                                                                                    |
| Final R indices [I > 2σ(I)]       | R1 = 0.0845, wR2 = 0.2235                                                                                |
| R indices (all data)              | R1 = 0.1320, wR2 = 0.2520                                                                                |
| Largest diff. peak and hole       | 1.915 and -1.004 e.Å <sup>-3</sup>                                                                       |

This crystal structure was modeled with a 12% occupancy of the chloride complex, CP<sub>3</sub>FeCl.

Additionally, one isopropyl group of the CP<sub>3</sub> ligand was modeled as disordered over two positions in a 49:51 ratio, and one trifluoromethyl group of the BAR<sub>4</sub><sup>F</sup> anion was modeled as disordered over two positions in a 48:52 ratio.

## Tables of Selected Bond Lengths and Angles

Selected bond lengths [ $\text{\AA}$ ] and angles [ $^\circ$ ] for  $[(\text{CP}^{i\text{Pr}}_3)\text{H}]\text{FeI}_2$  (**6**):

---

|                 |             |
|-----------------|-------------|
| I(2)-Fe(1)      | 2.5884(4)   |
| I(1)-Fe(1)      | 2.6062(4)   |
| Fe(1)-P(2)      | 2.4587(7)   |
| Fe(1)-P(1)      | 2.5134(7)   |
| <br>            |             |
| P(2)-Fe(1)-P(1) | 113.21(2)   |
| P(2)-Fe(1)-I(2) | 109.349(19) |
| P(1)-Fe(1)-I(2) | 116.625(19) |
| P(2)-Fe(1)-I(1) | 102.335(19) |
| P(1)-Fe(1)-I(1) | 99.721(18)  |
| I(2)-Fe(1)-I(1) | 114.490(14) |

---

Selected bond lengths [ $\text{\AA}$ ] and angles [ $^\circ$ ] for  $[(\text{CP}^{i\text{Pr}}_3)\text{H}]\text{FeBr}$  (**8**):

---

|                  |            |
|------------------|------------|
| Br(1)-Fe(1)      | 2.4647(7)  |
| Fe(1)-P(1)       | 2.3759(15) |
| Fe(1)-P(2)       | 2.3940(15) |
| Fe(1)-P(3)       | 2.3968(15) |
| <br>             |            |
| P(1)-Fe(1)-P(2)  | 110.58(5)  |
| P(1)-Fe(1)-P(3)  | 109.39(5)  |
| P(2)-Fe(1)-P(3)  | 110.12(5)  |
| P(1)-Fe(1)-Br(1) | 109.39(4)  |
| P(2)-Fe(1)-Br(1) | 107.70(4)  |
| P(3)-Fe(1)-Br(1) | 109.63(4)  |

---

Selected bond lengths [ $\text{\AA}$ ] and angles [ $^\circ$ ] for  $(\text{CP}^{\text{iPr}}_3)\text{Fe}(\text{N}_2)(\text{H})$  (**9**).

---

|                  |            |
|------------------|------------|
| Fe(1)-N(1)       | 1.8144(19) |
| Fe(1)-C(0)       | 2.155(2)   |
| Fe(1)-P(2)       | 2.1857(7)  |
| Fe(1)-P(3)       | 2.2502(7)  |
| Fe(1)-P(1)       | 2.2779(7)  |
| Fe(1)-H(01)      | 1.45(3)    |
| N(1)-N(2)        | 1.106(3)   |
|                  |            |
| N(1)-Fe(1)-C(0)  | 177.27(9)  |
| N(1)-Fe(1)-P(2)  | 95.87(7)   |
| C(0)-Fe(1)-P(2)  | 86.48(6)   |
| N(1)-Fe(1)-P(3)  | 94.18(7)   |
| C(0)-Fe(1)-P(3)  | 83.11(6)   |
| P(2)-Fe(1)-P(3)  | 141.23(3)  |
| N(1)-Fe(1)-P(1)  | 97.38(7)   |
| C(0)-Fe(1)-P(1)  | 83.41(6)   |
| P(2)-Fe(1)-P(1)  | 103.08(3)  |
| P(3)-Fe(1)-P(1)  | 112.60(2)  |
| N(1)-Fe(1)-H(01) | 95.5(13)   |
| C(0)-Fe(1)-H(01) | 83.9(13)   |
| P(2)-Fe(1)-H(01) | 72.5(13)   |
| P(3)-Fe(1)-H(01) | 69.3(13)   |
| P(1)-Fe(1)-H(01) | 166.8(13)  |

---

Selected bond lengths [ $\text{\AA}$ ] and angles [ $^\circ$ ] for  $(\text{CP}^{\text{iPr}}_3)\text{FeN}_2$  (**11**)

---

|                  |            |
|------------------|------------|
| Fe(1)-N(1)       | 1.797(2)   |
| Fe(1)-C(01)      | 2.152(3)   |
| Fe(1)-P(1)       | 2.2349(8)  |
| Fe(1)-P(3)       | 2.2602(8)  |
| Fe(1)-P(2)       | 2.2660(8)  |
| N(1)-N(2)        | 1.134(4)   |
|                  |            |
| N(1)-Fe(1)-C(01) | 174.80(11) |
| N(1)-Fe(1)-P(1)  | 96.71(8)   |
| C(01)-Fe(1)-P(1) | 82.62(6)   |
| N(1)-Fe(1)-P(3)  | 103.51(9)  |
| C(01)-Fe(1)-P(3) | 81.50(7)   |
| P(1)-Fe(1)-P(3)  | 110.81(3)  |
| N(1)-Fe(1)-P(2)  | 94.67(9)   |
| C(01)-Fe(1)-P(2) | 82.11(6)   |
| P(1)-Fe(1)-P(2)  | 132.54(3)  |
| P(3)-Fe(1)-P(2)  | 110.90(3)  |

---

Selected bond lengths [ $\text{\AA}$ ] and angles [ $^\circ$ ] for  $[(\text{CP}^{\text{iPr}}_3)\text{FeN}_2][\text{K}(\text{Et}_2\text{O})_3]$

---

|                  |            |
|------------------|------------|
| Fe(1)-N(1)       | 1.7397(16) |
| Fe(1)-C(01)      | 2.1646(17) |
| Fe(1)-P(3)       | 2.1947(5)  |
| Fe(1)-P(2)       | 2.2045(5)  |
| Fe(1)-P(1)       | 2.2047(5)  |
| K(1)-N(2)        | 2.6560(18) |
| N(1)-N(2)        | 1.153(2)   |
|                  |            |
| N(1)-Fe(1)-C(01) | 179.68(7)  |
| N(1)-Fe(1)-P(3)  | 96.27(5)   |
| C(01)-Fe(1)-P(3) | 83.81(5)   |



|                  |             |
|------------------|-------------|
| N(1)-Fe(1)-P(2)  | 96.29(5)    |
| C(01)-Fe(1)-P(2) | 83.93(5)    |
| P(3)-Fe(1)-P(2)  | 120.051(19) |
| N(1)-Fe(1)-P(1)  | 96.07(5)    |
| C(01)-Fe(1)-P(1) | 83.62(5)    |
| P(3)-Fe(1)-P(1)  | 118.686(19) |
| P(2)-Fe(1)-P(1)  | 117.797(19) |
| N(2)-N(1)-Fe(1)  | 179.86(19)  |
| N(1)-N(2)-K(1)   | 155.77(15)  |

---

Selected bond lengths [ $\text{\AA}$ ] and angles [ $^\circ$ ] for  $[(\text{CP}^{\text{iPr}}_3)\text{FeN}_2][\text{BAR}_4^{\text{F}}]$  (**13**)

|                  |            |
|------------------|------------|
| Fe(1)-N(1)       | 1.864(7)   |
| Fe(1)-C(01)      | 2.081(3)   |
| Fe(1)-P(1)       | 2.3248(9)  |
| Fe(1)-P(3)       | 2.3604(9)  |
| Fe(1)-P(2)       | 2.3885(10) |
| N(1)-Fe(1)-C(01) | 177.7(2)   |
| N(1)-Fe(1)-P(1)  | 93.62(18)  |
| C(01)-Fe(1)-P(1) | 84.31(8)   |
| N(1)-Fe(1)-P(3)  | 96.5(2)    |
| C(01)-Fe(1)-P(3) | 85.20(8)   |
| P(1)-Fe(1)-P(3)  | 117.04(3)  |
| N(1)-Fe(1)-P(2)  | 95.8(2)    |
| C(01)-Fe(1)-P(2) | 84.67(8)   |
| P(1)-Fe(1)-P(2)  | 124.77(4)  |
| P(3)-Fe(1)-P(2)  | 115.66(3)  |
| N(2)-N(1)-Fe(1)  | 178.4(6)   |

---

## Computational Results:

Coordinates for NBO analysis of **12**[K(Et<sub>2</sub>O)<sub>3</sub>] (from crystallographic structure):

| -----  |        |        |                         |           |           |  |
|--------|--------|--------|-------------------------|-----------|-----------|--|
| Center | Atomic | Atomic | Coordinates (Angstroms) |           |           |  |
| Number | Number | Type   | X                       | Y         | Z         |  |
| -----  |        |        |                         |           |           |  |
| 1      | 26     | 0      | -1.103223               | -0.012183 | 0.135795  |  |
| 2      | 19     | 0      | 4.315234                | -0.139004 | -0.090250 |  |
| 3      | 15     | 0      | -1.675324               | -1.173876 | 1.915082  |  |
| 4      | 15     | 0      | -1.065123               | -1.018414 | -1.816226 |  |
| 5      | 15     | 0      | -1.284994               | 2.184405  | 0.235987  |  |
| 6      | 8      | 0      | 4.528660                | 2.280807  | -1.344490 |  |
| 7      | 8      | 0      | 5.911867                | 0.348888  | 1.940111  |  |
| 8      | 7      | 0      | 0.612427                | -0.071693 | 0.411598  |  |
| 9      | 7      | 0      | 1.748732                | -0.115596 | 0.595993  |  |
| 10     | 8      | 0      | 4.713206                | -2.836955 | -0.525656 |  |
| 11     | 6      | 0      | -3.683547               | -1.101439 | -1.107075 |  |
| 12     | 6      | 0      | -2.848212               | 2.944956  | 2.477923  |  |
| 13     | 1      | 0      | -2.902445               | 3.411133  | 3.314657  |  |
| 14     | 1      | 0      | -2.943217               | 2.002256  | 2.629817  |  |
| 15     | 1      | 0      | -3.549324               | 3.247396  | 1.896562  |  |
| 16     | 6      | 0      | -5.300719               | 0.467098  | 1.314827  |  |
| 17     | 1      | 0      | -5.754021               | 0.820458  | 0.583473  |  |
| 18     | 6      | 0      | -4.001912               | -0.590995 | 3.509773  |  |
| 19     | 1      | 0      | -3.561669               | -0.948234 | 4.247172  |  |
| 20     | 6      | 0      | -3.352643               | -0.565059 | 2.266253  |  |
| 21     | 6      | 0      | -5.340093               | -2.690118 | -1.938757 |  |
| 22     | 1      | 0      | -6.213047               | -3.009821 | -1.927115 |  |
| 23     | 6      | 0      | -3.239989               | 0.059982  | -0.210069 |  |
| 24     | 6      | 0      | -5.939548               | 0.424855  | 2.554070  |  |
| 25     | 1      | 0      | -6.807180               | 0.746825  | 2.637851  |  |
| 26     | 6      | 0      | -3.995744               | -0.009489 | 1.140999  |  |
| 27     | 6      | 0      | -4.738827               | 1.530724  | -1.725792 |  |
| 28     | 1      | 0      | -5.272600               | 0.789814  | -1.900313 |  |
| 29     | 6      | 0      | -2.833970               | 2.529034  | -0.662244 |  |
| 30     | 6      | 0      | -0.699925               | -0.964724 | 3.508975  |  |
| 31     | 1      | 0      | -1.255246               | -1.274126 | 4.255707  |  |
| 32     | 6      | 0      | -3.177781               | 3.758444  | -1.223575 |  |
| 33     | 1      | 0      | -2.652914               | 4.506767  | -1.050375 |  |
| 34     | 6      | 0      | -5.064227               | 2.756173  | -2.308949 |  |
| 35     | 1      | 0      | -5.796246               | 2.817735  | -2.878437 |  |
| 36     | 6      | 0      | -1.997936               | -3.044284 | 2.072403  |  |
| 37     | 1      | 0      | -1.172254               | -3.499981 | 1.807364  |  |
| 38     | 6      | 0      | -3.630193               | 1.387339  | -0.885512 |  |

|    |   |   |           |           |           |
|----|---|---|-----------|-----------|-----------|
| 39 | 6 | 0 | -4.982113 | -1.629900 | -1.110692 |
| 40 | 1 | 0 | -5.621718 | -1.261735 | -0.545281 |
| 41 | 6 | 0 | -5.290076 | -0.092274 | 3.658747  |
| 42 | 1 | 0 | -5.709168 | -0.107013 | 4.489935  |
| 43 | 6 | 0 | -3.084558 | -3.496396 | 1.100751  |
| 44 | 1 | 0 | -3.186989 | -4.449759 | 1.155643  |
| 45 | 1 | 0 | -2.836970 | -3.251424 | 0.205987  |
| 46 | 1 | 0 | -3.914011 | -3.072883 | 1.330188  |
| 47 | 6 | 0 | -2.374639 | -3.573776 | 3.467980  |
| 48 | 1 | 0 | -3.208651 | -3.185989 | 3.743407  |
| 49 | 1 | 0 | -1.689325 | -3.336150 | 4.096275  |
| 50 | 1 | 0 | -2.461494 | -4.529577 | 3.434330  |
| 51 | 6 | 0 | -3.115644 | -2.771435 | -2.799728 |
| 52 | 1 | 0 | -2.483847 | -3.154087 | -3.366548 |
| 53 | 6 | 0 | -0.750968 | -1.148162 | -4.740497 |
| 54 | 1 | 0 | -1.580024 | -1.620407 | -4.840874 |
| 55 | 1 | 0 | -0.038712 | -1.776973 | -4.607887 |
| 56 | 1 | 0 | -0.578243 | -0.631117 | -5.530824 |
| 57 | 6 | 0 | 1.502649  | -2.065440 | -2.315231 |
| 58 | 1 | 0 | 1.815103  | -1.592208 | -1.539649 |
| 59 | 1 | 0 | 1.549957  | -1.489740 | -3.081720 |
| 60 | 1 | 0 | 2.053171  | -2.837709 | -2.460536 |
| 61 | 6 | 0 | -2.747844 | -1.699193 | -1.980183 |
| 62 | 6 | 0 | -0.325574 | 0.487045  | 3.757235  |
| 63 | 1 | 0 | 0.179496  | 0.553496  | 4.571506  |
| 64 | 1 | 0 | -1.124499 | 1.014869  | 3.832211  |
| 65 | 1 | 0 | 0.203405  | 0.811036  | 3.024982  |
| 66 | 6 | 0 | -0.022549 | -3.492168 | -0.929395 |
| 67 | 1 | 0 | 0.581790  | -4.220856 | -1.087339 |
| 68 | 1 | 0 | -0.916832 | -3.829177 | -0.851393 |
| 69 | 1 | 0 | 0.221701  | -3.043661 | -0.116590 |
| 70 | 6 | 0 | -1.487758 | 3.224594  | 1.824152  |
| 71 | 1 | 0 | -0.808956 | 2.902562  | 2.452414  |
| 72 | 6 | 0 | 0.050193  | -2.507521 | -2.095661 |
| 73 | 1 | 0 | -0.255203 | -2.969370 | -2.904599 |
| 74 | 6 | 0 | 0.580691  | -1.821703 | 3.461949  |
| 75 | 1 | 0 | 1.123702  | -1.546872 | 2.719257  |
| 76 | 1 | 0 | 0.343951  | -2.746055 | 3.359005  |
| 77 | 1 | 0 | 1.073156  | -1.706308 | 4.278167  |
| 78 | 6 | 0 | -0.838007 | -0.212835 | -3.526978 |
| 79 | 1 | 0 | 0.005710  | 0.283396  | -3.493229 |
| 80 | 6 | 0 | 5.552067  | 0.484633  | 3.317571  |
| 81 | 1 | 0 | 5.929145  | 1.302376  | 3.676051  |
| 82 | 1 | 0 | 5.908135  | -0.261935 | 3.825577  |
| 83 | 6 | 0 | 7.315816  | 0.488607  | 1.718843  |
| 84 | 1 | 0 | 7.801006  | -0.186282 | 2.219940  |
| 85 | 1 | 0 | 7.613666  | 1.363018  | 2.015963  |
| 86 | 6 | 0 | -1.299822 | 4.739239  | 1.722486  |

|     |   |   |           |           |           |
|-----|---|---|-----------|-----------|-----------|
| 87  | 1 | 0 | -1.914962 | 5.096379  | 1.078526  |
| 88  | 1 | 0 | -0.400500 | 4.932966  | 1.446202  |
| 89  | 1 | 0 | -1.464279 | 5.140526  | 2.579276  |
| 90  | 6 | 0 | -4.406596 | -3.272724 | -2.778249 |
| 91  | 1 | 0 | -4.643071 | -3.990150 | -3.321219 |
| 92  | 6 | 0 | -0.039374 | 3.319208  | -0.609736 |
| 93  | 1 | 0 | -0.364441 | 4.240727  | -0.526365 |
| 94  | 6 | 0 | 5.211785  | 3.482161  | -0.977128 |
| 95  | 1 | 0 | 4.717915  | 4.251132  | -1.301884 |
| 96  | 1 | 0 | 6.092941  | 3.493459  | -1.381554 |
| 97  | 6 | 0 | 5.431388  | -3.446517 | -1.561156 |
| 98  | 1 | 0 | 4.909694  | -4.171249 | -1.941774 |
| 99  | 1 | 0 | 6.257089  | -3.817878 | -1.214349 |
| 100 | 6 | 0 | 1.307915  | 3.224629  | 0.107122  |
| 101 | 1 | 0 | 1.676736  | 2.348031  | -0.020042 |
| 102 | 1 | 0 | 1.184523  | 3.386169  | 1.045478  |
| 103 | 1 | 0 | 1.909864  | 3.882193  | -0.252694 |
| 104 | 6 | 0 | 4.068393  | 0.517784  | 3.442582  |
| 105 | 1 | 0 | 3.721485  | 1.265472  | 2.948807  |
| 106 | 1 | 0 | 3.827230  | 0.606058  | 4.366826  |
| 107 | 1 | 0 | 3.699349  | -0.296154 | 3.090825  |
| 108 | 6 | 0 | 7.581088  | 0.327433  | 0.244385  |
| 109 | 1 | 0 | 7.263162  | -0.529819 | -0.046117 |
| 110 | 1 | 0 | 8.524717  | 0.391569  | 0.080971  |
| 111 | 1 | 0 | 7.123341  | 1.019454  | -0.239674 |
| 112 | 6 | 0 | -1.943089 | 0.817273  | -3.782952 |
| 113 | 1 | 0 | -1.701239 | 1.365393  | -4.533243 |
| 114 | 1 | 0 | -2.051741 | 1.370207  | -3.005635 |
| 115 | 1 | 0 | -2.768224 | 0.362999  | -3.969832 |
| 116 | 6 | 0 | 0.135799  | 3.014067  | -2.094347 |
| 117 | 1 | 0 | 0.816189  | 3.583836  | -2.459410 |
| 118 | 1 | 0 | -0.692505 | 3.169693  | -2.553507 |
| 119 | 1 | 0 | 0.395576  | 2.095831  | -2.203060 |
| 120 | 6 | 0 | 5.338946  | 3.557421  | 0.519011  |
| 121 | 1 | 0 | 4.464517  | 3.536775  | 0.915276  |
| 122 | 1 | 0 | 5.781619  | 4.374392  | 0.762325  |
| 123 | 1 | 0 | 5.851605  | 2.809564  | 0.835438  |
| 124 | 6 | 0 | 4.081567  | 2.325066  | -2.694760 |
| 125 | 1 | 0 | 4.843965  | 2.383314  | -3.292513 |
| 126 | 1 | 0 | 3.527624  | 3.108279  | -2.831847 |
| 127 | 6 | 0 | -4.305306 | 3.877919  | -2.045170 |
| 128 | 1 | 0 | -4.540148 | 4.701034  | -2.407612 |
| 129 | 6 | 0 | 5.733516  | -2.440262 | -2.609574 |
| 130 | 1 | 0 | 4.912970  | -2.089325 | -2.961565 |
| 131 | 1 | 0 | 6.234523  | -2.854135 | -3.317077 |
| 132 | 1 | 0 | 6.248687  | -1.726357 | -2.227458 |
| 133 | 6 | 0 | 3.297851  | 1.090761  | -2.994716 |
| 134 | 1 | 0 | 3.881903  | 0.327903  | -2.972567 |

|     |   |   |          |           |           |
|-----|---|---|----------|-----------|-----------|
| 135 | 1 | 0 | 2.902512 | 1.166548  | -3.865794 |
| 136 | 1 | 0 | 2.606298 | 0.983340  | -2.337685 |
| 137 | 6 | 0 | 3.297906 | -3.191439 | 1.321519  |
| 138 | 1 | 0 | 3.844961 | -2.661537 | 1.906929  |
| 139 | 1 | 0 | 2.836541 | -3.860832 | 1.835131  |
| 140 | 1 | 0 | 2.656223 | -2.626817 | 0.883823  |
| 141 | 6 | 0 | 4.136732 | -3.836024 | 0.327386  |
| 142 | 1 | 0 | 4.839780 | -4.339808 | 0.765526  |
| 143 | 1 | 0 | 3.606577 | -4.453089 | -0.201928 |

*Natural Population and Charge Analysis*

Summary of Natural Population Analysis:

| Atom No | Charge   | Core     | Valence | Rydberg | Total    |
|---------|----------|----------|---------|---------|----------|
| Fe 1    | -1.46741 | 17.98394 | 9.44097 | 0.04249 | 27.46741 |
| K 2     | 0.64775  | 17.99326 | 0.35849 | 0.00050 | 18.35225 |
| P 3     | 1.27701  | 9.99593  | 3.65507 | 0.07199 | 13.72299 |
| P 4     | 1.27393  | 9.99590  | 3.65705 | 0.07311 | 13.72607 |
| P 5     | 1.26960  | 9.99597  | 3.66199 | 0.07244 | 13.73040 |
| O 6     | -0.62206 | 1.99980  | 6.60170 | 0.02056 | 8.62206  |
| O 7     | -0.62871 | 1.99981  | 6.61012 | 0.01878 | 8.62871  |
| N 8     | 0.13757  | 1.99930  | 4.78375 | 0.07939 | 6.86243  |
| N 9     | -0.38115 | 1.99962  | 5.34359 | 0.03794 | 7.38115  |
| O 10    | -0.61888 | 1.99980  | 6.59853 | 0.02055 | 8.61888  |
| C 11    | 0.03324  | 1.99900  | 3.94356 | 0.02420 | 5.96676  |
| C 12    | -0.58933 | 1.99939  | 4.58194 | 0.00799 | 6.58933  |
| H 13    | 0.20074  | 0.00000  | 0.79796 | 0.00130 | 0.79926  |
| H 14    | 0.21689  | 0.00000  | 0.78114 | 0.00197 | 0.78311  |
| H 15    | 0.21007  | 0.00000  | 0.78860 | 0.00132 | 0.78993  |
| C 16    | -0.20245 | 1.99889  | 4.18565 | 0.01790 | 6.20245  |
| H 17    | 0.19715  | 0.00000  | 0.80047 | 0.00238 | 0.80285  |
| C 18    | -0.19551 | 1.99919  | 4.18152 | 0.01480 | 6.19551  |
| H 19    | 0.18943  | 0.00000  | 0.80850 | 0.00208 | 0.81057  |
| C 20    | -0.36151 | 1.99893  | 4.33351 | 0.02906 | 6.36151  |
| C 21    | -0.19506 | 1.99933  | 4.18256 | 0.01317 | 6.19506  |
| H 22    | 0.19161  | 0.00000  | 0.80668 | 0.00171 | 0.80839  |
| C 23    | -0.24383 | 1.99889  | 4.20581 | 0.03913 | 6.24383  |
| C 24    | -0.19708 | 1.99933  | 4.18432 | 0.01343 | 6.19708  |
| H 25    | 0.19149  | 0.00000  | 0.80686 | 0.00166 | 0.80851  |
| C 26    | 0.03137  | 1.99899  | 3.94618 | 0.02346 | 5.96863  |
| C 27    | -0.21664 | 1.99913  | 4.20149 | 0.01602 | 6.21664  |
| H 28    | 0.19763  | 0.00000  | 0.80004 | 0.00233 | 0.80237  |
| C 29    | -0.36260 | 1.99893  | 4.33489 | 0.02879 | 6.36260  |
| C 30    | -0.53199 | 1.99929  | 4.51377 | 0.01892 | 6.53199  |
| H 31    | 0.20509  | 0.00000  | 0.79210 | 0.00281 | 0.79491  |

|      |          |         |         |         |         |
|------|----------|---------|---------|---------|---------|
| C 32 | -0.17988 | 1.99894 | 4.16487 | 0.01608 | 6.17988 |
| H 33 | 0.18683  | 0.00000 | 0.81093 | 0.00223 | 0.81317 |
| C 34 | -0.19064 | 1.99931 | 4.17808 | 0.01325 | 6.19064 |
| H 35 | 0.19093  | 0.00000 | 0.80734 | 0.00173 | 0.80907 |
| C 36 | -0.52730 | 1.99926 | 4.51037 | 0.01768 | 6.52730 |
| H 37 | 0.20537  | 0.00000 | 0.79253 | 0.00210 | 0.79463 |
| C 38 | 0.03888  | 1.99897 | 3.93768 | 0.02447 | 5.96112 |
| C 39 | -0.20266 | 1.99890 | 4.18569 | 0.01808 | 6.20266 |
| H 40 | 0.19621  | 0.00000 | 0.80127 | 0.00252 | 0.80379 |
| C 41 | -0.21185 | 1.99931 | 4.19886 | 0.01368 | 6.21185 |
| H 42 | 0.19221  | 0.00000 | 0.80600 | 0.00180 | 0.80779 |
| C 43 | -0.58951 | 1.99940 | 4.58192 | 0.00819 | 6.58951 |
| H 44 | 0.20163  | 0.00000 | 0.79705 | 0.00133 | 0.79837 |
| H 45 | 0.21463  | 0.00000 | 0.78340 | 0.00198 | 0.78537 |
| H 46 | 0.21065  | 0.00000 | 0.78794 | 0.00140 | 0.78935 |
| C 47 | -0.60288 | 1.99940 | 4.59489 | 0.00858 | 6.60288 |
| H 48 | 0.20842  | 0.00000 | 0.78997 | 0.00161 | 0.79158 |
| H 49 | 0.19819  | 0.00000 | 0.80052 | 0.00129 | 0.80181 |
| H 50 | 0.20729  | 0.00000 | 0.79144 | 0.00127 | 0.79271 |
| C 51 | -0.18450 | 1.99894 | 4.16936 | 0.01620 | 6.18450 |
| H 52 | 0.18808  | 0.00000 | 0.80963 | 0.00229 | 0.81192 |
| C 53 | -0.60314 | 1.99941 | 4.59520 | 0.00854 | 6.60314 |
| H 54 | 0.20821  | 0.00000 | 0.79017 | 0.00162 | 0.79179 |
| H 55 | 0.19684  | 0.00000 | 0.80188 | 0.00127 | 0.80316 |
| H 56 | 0.20700  | 0.00000 | 0.79174 | 0.00126 | 0.79300 |
| C 57 | -0.59043 | 1.99941 | 4.58309 | 0.00792 | 6.59043 |
| H 58 | 0.20584  | 0.00000 | 0.79087 | 0.00329 | 0.79416 |
| H 59 | 0.20060  | 0.00000 | 0.79807 | 0.00134 | 0.79940 |
| H 60 | 0.19874  | 0.00000 | 0.79959 | 0.00167 | 0.80126 |
| C 61 | -0.36574 | 1.99894 | 4.33721 | 0.02958 | 6.36574 |
| C 62 | -0.59173 | 1.99941 | 4.58456 | 0.00776 | 6.59173 |
| H 63 | 0.19847  | 0.00000 | 0.80017 | 0.00135 | 0.80153 |
| H 64 | 0.21141  | 0.00000 | 0.78727 | 0.00132 | 0.78859 |
| H 65 | 0.21350  | 0.00000 | 0.78420 | 0.00230 | 0.78650 |
| C 66 | -0.58995 | 1.99940 | 4.58279 | 0.00775 | 6.58995 |
| H 67 | 0.19510  | 0.00000 | 0.80351 | 0.00140 | 0.80490 |
| H 68 | 0.21447  | 0.00000 | 0.78424 | 0.00129 | 0.78553 |
| H 69 | 0.21245  | 0.00000 | 0.78575 | 0.00180 | 0.78755 |
| C 70 | -0.52833 | 1.99925 | 4.51129 | 0.01779 | 6.52833 |
| H 71 | 0.20886  | 0.00000 | 0.78893 | 0.00221 | 0.79114 |
| C 72 | -0.53421 | 1.99929 | 4.51541 | 0.01950 | 6.53421 |
| H 73 | 0.20462  | 0.00000 | 0.79260 | 0.00279 | 0.79538 |
| C 74 | -0.59659 | 1.99940 | 4.58966 | 0.00753 | 6.59659 |
| H 75 | 0.21373  | 0.00000 | 0.78432 | 0.00195 | 0.78627 |
| H 76 | 0.20192  | 0.00000 | 0.79687 | 0.00121 | 0.79808 |
| H 77 | 0.20178  | 0.00000 | 0.79689 | 0.00133 | 0.79822 |
| C 78 | -0.53038 | 1.99926 | 4.51316 | 0.01796 | 6.53038 |
| H 79 | 0.20219  | 0.00000 | 0.79557 | 0.00224 | 0.79781 |

|       |          |         |         |         |         |
|-------|----------|---------|---------|---------|---------|
| C 80  | -0.04176 | 1.99917 | 4.03024 | 0.01235 | 6.04176 |
| H 81  | 0.17980  | 0.00000 | 0.81822 | 0.00198 | 0.82020 |
| H 82  | 0.18048  | 0.00000 | 0.81756 | 0.00195 | 0.81952 |
| C 83  | -0.04055 | 1.99918 | 4.02912 | 0.01225 | 6.04055 |
| H 84  | 0.18398  | 0.00000 | 0.81407 | 0.00195 | 0.81602 |
| H 85  | 0.18176  | 0.00000 | 0.81610 | 0.00214 | 0.81824 |
| C 86  | -0.60429 | 1.99941 | 4.59648 | 0.00840 | 6.60429 |
| H 87  | 0.20382  | 0.00000 | 0.79463 | 0.00155 | 0.79618 |
| H 88  | 0.19918  | 0.00000 | 0.79960 | 0.00122 | 0.80082 |
| H 89  | 0.20902  | 0.00000 | 0.78966 | 0.00131 | 0.79098 |
| C 90  | -0.21908 | 1.99933 | 4.20583 | 0.01391 | 6.21908 |
| H 91  | 0.19181  | 0.00000 | 0.80641 | 0.00178 | 0.80819 |
| C 92  | -0.53192 | 1.99929 | 4.51319 | 0.01944 | 6.53192 |
| H 93  | 0.20485  | 0.00000 | 0.79225 | 0.00291 | 0.79515 |
| C 94  | -0.04050 | 1.99917 | 4.02887 | 0.01245 | 6.04050 |
| H 95  | 0.18419  | 0.00000 | 0.81373 | 0.00208 | 0.81581 |
| H 96  | 0.17602  | 0.00000 | 0.82199 | 0.00198 | 0.82398 |
| C 97  | -0.04141 | 1.99921 | 4.02880 | 0.01339 | 6.04141 |
| H 98  | 0.18298  | 0.00000 | 0.81479 | 0.00223 | 0.81702 |
| H 99  | 0.17782  | 0.00000 | 0.82014 | 0.00204 | 0.82218 |
| C 100 | -0.59222 | 1.99940 | 4.58489 | 0.00793 | 6.59222 |
| H 101 | 0.21333  | 0.00000 | 0.78348 | 0.00319 | 0.78667 |
| H 102 | 0.20373  | 0.00000 | 0.79499 | 0.00127 | 0.79627 |
| H 103 | 0.19554  | 0.00000 | 0.80292 | 0.00154 | 0.80446 |
| C 104 | -0.61128 | 1.99945 | 4.60495 | 0.00688 | 6.61128 |
| H 105 | 0.21744  | 0.00000 | 0.78076 | 0.00180 | 0.78256 |
| H 106 | 0.22131  | 0.00000 | 0.77775 | 0.00094 | 0.77869 |
| H 107 | 0.21682  | 0.00000 | 0.78151 | 0.00168 | 0.78318 |
| C 108 | -0.61590 | 1.99944 | 4.60973 | 0.00673 | 6.61590 |
| H 109 | 0.20825  | 0.00000 | 0.79001 | 0.00173 | 0.79175 |
| H 110 | 0.22330  | 0.00000 | 0.77583 | 0.00088 | 0.77670 |
| H 111 | 0.20956  | 0.00000 | 0.78844 | 0.00200 | 0.79044 |
| C 112 | -0.58856 | 1.99939 | 4.58096 | 0.00821 | 6.58856 |
| H 113 | 0.20075  | 0.00000 | 0.79802 | 0.00124 | 0.79925 |
| H 114 | 0.21848  | 0.00000 | 0.77936 | 0.00215 | 0.78152 |
| H 115 | 0.20985  | 0.00000 | 0.78888 | 0.00127 | 0.79015 |
| C 116 | -0.59188 | 1.99940 | 4.58480 | 0.00768 | 6.59188 |
| H 117 | 0.19375  | 0.00000 | 0.80484 | 0.00141 | 0.80625 |
| H 118 | 0.21584  | 0.00000 | 0.78280 | 0.00135 | 0.78416 |
| H 119 | 0.20764  | 0.00000 | 0.79076 | 0.00160 | 0.79236 |
| C 120 | -0.61677 | 1.99943 | 4.61060 | 0.00674 | 6.61677 |
| H 121 | 0.22032  | 0.00000 | 0.77814 | 0.00154 | 0.77968 |
| H 122 | 0.21640  | 0.00000 | 0.78267 | 0.00092 | 0.78360 |
| H 123 | 0.20455  | 0.00000 | 0.79327 | 0.00218 | 0.79545 |
| C 124 | -0.04114 | 1.99918 | 4.02940 | 0.01256 | 6.04114 |
| H 125 | 0.17691  | 0.00000 | 0.82114 | 0.00195 | 0.82309 |
| H 126 | 0.18667  | 0.00000 | 0.81131 | 0.00202 | 0.81333 |
| C 127 | -0.21780 | 1.99933 | 4.20443 | 0.01404 | 6.21780 |

|       |          |         |         |         |         |
|-------|----------|---------|---------|---------|---------|
| H 128 | 0.19017  | 0.00000 | 0.80811 | 0.00172 | 0.80983 |
| C 129 | -0.61559 | 1.99945 | 4.60971 | 0.00643 | 6.61559 |
| H 130 | 0.21392  | 0.00000 | 0.78443 | 0.00165 | 0.78608 |
| H 131 | 0.22119  | 0.00000 | 0.77791 | 0.00090 | 0.77881 |
| H 132 | 0.20221  | 0.00000 | 0.79625 | 0.00154 | 0.79779 |
| C 133 | -0.61285 | 1.99945 | 4.60617 | 0.00723 | 6.61285 |
| H 134 | 0.19711  | 0.00000 | 0.80130 | 0.00159 | 0.80289 |
| H 135 | 0.22545  | 0.00000 | 0.77350 | 0.00105 | 0.77455 |
| H 136 | 0.22507  | 0.00000 | 0.77309 | 0.00183 | 0.77493 |
| C 137 | -0.61910 | 1.99947 | 4.61242 | 0.00721 | 6.61910 |
| H 138 | 0.20434  | 0.00000 | 0.79398 | 0.00168 | 0.79566 |
| H 139 | 0.22460  | 0.00000 | 0.77445 | 0.00095 | 0.77540 |
| H 140 | 0.22981  | 0.00000 | 0.76837 | 0.00182 | 0.77019 |
| C 141 | -0.04266 | 1.99914 | 4.03108 | 0.01244 | 6.04266 |
| H 142 | 0.17873  | 0.00000 | 0.81929 | 0.00198 | 0.82127 |
| H 143 | 0.18493  | 0.00000 | 0.81298 | 0.00209 | 0.81507 |

*Natural Bond Orbital Analysis for Bonds of Interest*

(Occupancy) Bond orbital/ Coefficients/ Hybrids

- 
1. (1.84620) BD ( 1)Fe 1 - P 3  
 ( 25.00%) 0.5000\*Fe 1 s( 22.10%)p 2.97( 65.54%)d 0.56( 12.36%)  
 f 0.00( 0.01%)  
 0.0000 0.0000 0.0018 -0.4700 0.0030  
 0.0000 -0.0006 -0.1440 0.0154 0.0016  
 -0.0079 0.0000 0.0003 -0.4789 0.0132  
 -0.0005 -0.0004 0.0000 0.0014 0.6363  
 -0.0072 0.0047 0.0020 0.0503 0.0003  
 -0.0007 -0.1079 -0.0087 0.0016 -0.1041  
 0.0224 -0.0069 -0.2673 -0.0003 -0.0053  
 0.1624 -0.0056 0.0040 -0.0011 0.0011  
 -0.0075 -0.0013 0.0018 -0.0005 -0.0016
- ( 75.00%) 0.8660\* P 3 s( 45.61%)p 1.19( 54.37%)d 0.00( 0.02%)  
 0.0000 0.0009 0.6748 0.0261 0.0044  
 -0.0013 0.0004 0.2963 -0.0194 0.0014  
 0.0002 0.2694 -0.0281 0.0033 -0.0003  
 -0.6165 0.0463 0.0044 0.0013 -0.0073  
 -0.0067 -0.0023 0.0082
2. (1.84783) BD ( 1)Fe 1 - P 4  
 ( 24.66%) 0.4966\*Fe 1 s( 22.28%)p 2.95( 65.73%)d 0.54( 11.98%)  
 f 0.00( 0.01%)  
 0.0000 0.0000 0.0012 -0.4720 0.0029  
 0.0000 -0.0004 0.0875 0.0133 0.0038  
 -0.0055 0.0000 -0.0013 -0.3277 0.0023  
 -0.0026 -0.0029 0.0000 -0.0005 -0.7360  
 0.0174 0.0047 -0.0025 0.0104 0.0088



-0.0022 -0.0817 0.0103 -0.0062 0.0726  
 -0.0142 0.0036 -0.2421 -0.0118 -0.0018  
 0.2199 -0.0116 0.0064 -0.0014 0.0006  
 -0.0072 -0.0012 0.0020 -0.0015 -0.0022  
 ( 75.34%) 0.8680\* P 4 s( 46.11%)p 1.17( 53.87%)d 0.00( 0.02%)  
 0.0000 0.0008 0.6785 0.0271 0.0038  
 -0.0017 0.0003 0.1088 -0.0037 0.0030  
 0.0002 0.4019 -0.0288 -0.0074 0.0004  
 0.6016 -0.0503 0.0011 0.0019 0.0006  
 0.0097 -0.0040 0.0062

3. (1.84905) BD ( 1)Fe 1 - P 5  
 ( 24.92%) 0.4992\*Fe 1 s( 22.39%)p 2.91( 65.15%)d 0.56( 12.45%)  
 f 0.00( 0.01%)  
 0.0000 0.0000 0.0018 -0.4732 0.0013  
 0.0000 -0.0002 -0.0073 0.0149 0.0020  
 -0.0063 0.0000 0.0010 0.8020 -0.0182  
 0.0024 0.0032 0.0000 -0.0012 0.0872  
 -0.0052 -0.0036 -0.0012 0.0023 -0.0101  
 0.0045 -0.0803 -0.0030 -0.0003 0.0345  
 -0.0077 0.0035 -0.3346 0.0087 -0.0083  
 0.0652 0.0176 -0.0019 -0.0011 0.0003  
 -0.0076 -0.0021 0.0012 -0.0013 -0.0024  
 ( 75.08%) 0.8665\* P 5 s( 45.74%)p 1.19( 54.24%)d 0.00( 0.02%)  
 0.0000 0.0008 0.6758 0.0266 0.0043  
 -0.0014 0.0004 0.1620 -0.0073 0.0026  
 -0.0004 -0.7133 0.0572 0.0020 0.0000  
 0.0627 0.0009 -0.0065 -0.0034 0.0000  
 -0.0020 -0.0112 -0.0053

4. (1.93106) BD ( 1)Fe 1 - N 8  
 ( 20.42%) 0.4519\*Fe 1 s( 18.42%)p 2.68( 49.34%)d 1.75( 32.18%)  
 f 0.00( 0.06%)  
 0.0000 0.0000 0.0014 -0.4286 -0.0217  
 0.0000 -0.0003 0.6896 0.0616 -0.0002  
 -0.0021 0.0000 0.0000 -0.0237 -0.0021  
 0.0002 0.0016 0.0000 -0.0001 0.1161  
 0.0098 0.0012 -0.0010 -0.0345 -0.0021  
 -0.0003 0.1546 0.0061 0.0013 -0.0024  
 -0.0013 0.0002 0.4791 0.0198 0.0040  
 -0.2581 -0.0108 -0.0023 -0.0051 -0.0130  
 -0.0009 0.0078 -0.0001 0.0185 -0.0022  
 ( 79.58%) 0.8921\* N 8 s( 64.45%)p 0.55( 35.55%)d 0.00( 0.00%)  
 0.0000 0.8016 0.0435 -0.0028 -0.0001  
 -0.5864 0.0458 0.0048 0.0212 -0.0016  
 -0.0002 -0.0950 0.0043 0.0016 -0.0001  
 0.0004 0.0000 0.0019 -0.0009

5. (1.76371) BD ( 1)Fe 1 - C 23  
 ( 27.45%) 0.5240\*Fe 1 s( 14.70%)p 3.43( 50.36%)d 2.38( 34.92%)  
 f 0.00( 0.03%)

0.0000 0.0000 0.0024 -0.3833 0.0068  
 0.0000 -0.0017 -0.6994 -0.0290 0.0077  
 -0.0040 0.0000 0.0001 0.0268 0.0008  
 -0.0002 -0.0014 0.0000 -0.0002 -0.1130  
 -0.0047 0.0025 0.0005 -0.0362 0.0015  
 -0.0002 0.1614 -0.0070 0.0025 -0.0047  
 -0.0002 -0.0003 0.4992 -0.0195 0.0072  
 -0.2682 0.0103 -0.0036 0.0020 0.0085  
 -0.0020 -0.0059 0.0005 -0.0120 0.0006  
 ( 72.55%) 0.8517\* C 23 s( 26.97%)p 2.71( 73.03%)d 0.00( 0.00%)  
 0.0007 0.5192 0.0058 0.0073 0.0001  
 0.8427 -0.0354 -0.0055 -0.0320 0.0006  
 0.0004 0.1334 -0.0063 -0.0012 0.0004  
 -0.0009 -0.0001 -0.0024 0.0012  
 1513. (0.04357) BD\*( 1)Fe 1 - P 3  
 ( 75.00%) 0.8660\*Fe 1 s( 22.10%)p 2.97( 65.54%)d 0.56( 12.36%)  
 f 0.00( 0.01%)  
 0.0000 0.0000 0.0018 -0.4700 0.0030  
 0.0000 -0.0006 -0.1440 0.0154 0.0016  
 -0.0079 0.0000 0.0003 -0.4789 0.0132  
 -0.0005 -0.0004 0.0000 0.0014 0.6363  
 -0.0072 0.0047 0.0020 0.0503 0.0003  
 -0.0007 -0.1079 -0.0087 0.0016 -0.1041  
 0.0224 -0.0069 -0.2673 -0.0003 -0.0053  
 0.1624 -0.0056 0.0040 -0.0011 0.0011  
 -0.0075 -0.0013 0.0018 -0.0005 -0.0016  
 ( 25.00%) -0.5000\* P 3 s( 45.61%)p 1.19( 54.37%)d 0.00( 0.02%)  
 0.0000 0.0009 0.6748 0.0261 0.0044  
 -0.0013 0.0004 0.2963 -0.0194 0.0014  
 0.0002 0.2694 -0.0281 0.0033 -0.0003  
 -0.6165 0.0463 0.0044 0.0013 -0.0073  
 -0.0067 -0.0023 0.0082  
 1514. (0.04400) BD\*( 1)Fe 1 - P 4  
 ( 75.34%) 0.8680\*Fe 1 s( 22.28%)p 2.95( 65.73%)d 0.54( 11.98%)  
 f 0.00( 0.01%)  
 0.0000 0.0000 0.0012 -0.4720 0.0029  
 0.0000 -0.0004 0.0875 0.0133 0.0038  
 -0.0055 0.0000 -0.0013 -0.3277 0.0023  
 -0.0026 -0.0029 0.0000 -0.0005 -0.7360  
 0.0174 0.0047 -0.0025 0.0104 0.0088  
 -0.0022 -0.0817 0.0103 -0.0062 0.0726  
 -0.0142 0.0036 -0.2421 -0.0118 -0.0018  
 0.2199 -0.0116 0.0064 -0.0014 0.0006  
 -0.0072 -0.0012 0.0020 -0.0015 -0.0022  
 ( 24.66%) -0.4966\* P 4 s( 46.11%)p 1.17( 53.87%)d 0.00( 0.02%)  
 0.0000 0.0008 0.6785 0.0271 0.0038  
 -0.0017 0.0003 0.1088 -0.0037 0.0030  
 0.0002 0.4019 -0.0288 -0.0074 0.0004

0.6016 -0.0503 0.0011 0.0019 0.0006  
 0.0097 -0.0040 0.0062  
 1515. (0.04386) BD\*( 1)Fe 1 - P 5  
 ( 75.08%) 0.8665\*Fe 1 s( 22.39%)p 2.91( 65.15%)d 0.56( 12.45%)  
 f 0.00( 0.01%)  
 0.0000 0.0000 0.0018 -0.4732 0.0013  
 0.0000 -0.0002 -0.0073 0.0149 0.0020  
 -0.0063 0.0000 0.0010 0.8020 -0.0182  
 0.0024 0.0032 0.0000 -0.0012 0.0872  
 -0.0052 -0.0036 -0.0012 0.0023 -0.0101  
 0.0045 -0.0803 -0.0030 -0.0003 0.0345  
 -0.0077 0.0035 -0.3346 0.0087 -0.0083  
 0.0652 0.0176 -0.0019 -0.0011 0.0003  
 -0.0076 -0.0021 0.0012 -0.0013 -0.0024  
 ( 24.92%) -0.4992\* P 5 s( 45.74%)p 1.19( 54.24%)d 0.00( 0.02%)  
 0.0000 0.0008 0.6758 0.0266 0.0043  
 -0.0014 0.0004 0.1620 -0.0073 0.0026  
 -0.0004 -0.7133 0.0572 0.0020 0.0000  
 0.0627 0.0009 -0.0065 -0.0034 0.0000  
 -0.0020 -0.0112 -0.0053  
 1516. (0.08300) BD\*( 1)Fe 1 - N 8  
 ( 79.58%) 0.8921\*Fe 1 s( 18.42%)p 2.68( 49.34%)d 1.75( 32.18%)  
 f 0.00( 0.06%)  
 0.0000 0.0000 0.0014 -0.4286 -0.0217  
 0.0000 -0.0003 0.6896 0.0616 -0.0002  
 -0.0021 0.0000 0.0000 -0.0237 -0.0021  
 0.0002 0.0016 0.0000 -0.0001 0.1161  
 0.0098 0.0012 -0.0010 -0.0345 -0.0021  
 -0.0003 0.1546 0.0061 0.0013 -0.0024  
 -0.0013 0.0002 0.4791 0.0198 0.0040  
 -0.2581 -0.0108 -0.0023 -0.0051 -0.0130  
 -0.0009 0.0078 -0.0001 0.0185 -0.0022  
 ( 20.42%) -0.4519\* N 8 s( 64.45%)p 0.55( 35.55%)d 0.00( 0.00%)  
 0.0000 0.8016 0.0435 -0.0028 -0.0001  
 -0.5864 0.0458 0.0048 0.0212 -0.0016  
 -0.0002 -0.0950 0.0043 0.0016 -0.0001  
 0.0004 0.0000 0.0019 -0.0009  
 1517. (0.09062) BD\*( 1)Fe 1 - C 23  
 ( 72.55%) 0.8517\*Fe 1 s( 14.70%)p 3.43( 50.36%)d 2.38( 34.92%)  
 f 0.00( 0.03%)  
 0.0000 0.0000 0.0024 -0.3833 0.0068  
 0.0000 -0.0017 -0.6994 -0.0290 0.0077  
 -0.0040 0.0000 0.0001 0.0268 0.0008  
 -0.0002 -0.0014 0.0000 -0.0002 -0.1130  
 -0.0047 0.0025 0.0005 -0.0362 0.0015  
 -0.0002 0.1614 -0.0070 0.0025 -0.0047  
 -0.0002 -0.0003 0.4992 -0.0195 0.0072  
 -0.2682 0.0103 -0.0036 0.0020 0.0085

-0.0020 -0.0059 0.0005 -0.0120 0.0006  
 ( 27.45%) -0.5240\* C 23 s( 26.97%)p 2.71( 73.03%)d 0.00( 0.00%)  
 0.0007 0.5192 0.0058 0.0073 0.0001  
 0.8427 -0.0354 -0.0055 -0.0320 0.0006  
 0.0004 0.1334 -0.0063 -0.0012 0.0004  
 -0.0009 -0.0001 -0.0024 0.0012

(0.03482) BD\*( 1) C 11 - C 23  
 ( 48.70%) 0.6978\* C 11 s( 33.58%)p 1.98( 66.38%)d 0.00( 0.03%)  
 -0.0001 -0.5792 -0.0172 -0.0008 0.0009  
 -0.2099 0.0082 -0.0022 -0.6201 0.0243  
 0.0038 -0.4842 0.0106 0.0047 -0.0066  
 -0.0035 -0.0148 0.0080 0.0001  
 ( 51.30%) -0.7163\* C 23 s( 24.80%)p 3.03( 75.13%)d 0.00( 0.07%)  
 0.0002 -0.4979 0.0073 0.0026 0.0001  
 0.2526 0.0037 -0.0023 0.6602 0.0177  
 0.0084 0.5012 0.0072 0.0070 -0.0160  
 -0.0119 -0.0162 0.0080 -0.0005

1537. (0.03133) BD\*( 1) C 11 - C 39  
 ( 49.58%) 0.7041\* C 11 s( 33.03%)p 2.03( 66.94%)d 0.00( 0.02%)  
 0.0002 -0.5746 0.0136 0.0025 -0.0007  
 0.7661 0.0163 0.0115 0.2861 -0.0003  
 -0.0004 -0.0117 -0.0095 0.0016 -0.0089  
 -0.0019 0.0018 -0.0092 0.0076  
 ( 50.42%) -0.7101\* C 39 s( 33.98%)p 1.94( 65.94%)d 0.00( 0.08%)  
 -0.0002 -0.5829 -0.0049 -0.0014 -0.7523  
 0.0055 0.0184 -0.3044 -0.0110 0.0071  
 0.0055 -0.0137 -0.0018 -0.0173 0.0018  
 -0.0100 -0.0141 0.0134

1538. (0.31948) BD\*( 2) C 11 - C 39  
 ( 53.31%) 0.7301\* C 11 s( 0.01%)p 1.00( 99.94%)d 0.00( 0.05%)  
 0.0000 -0.0091 -0.0008 0.0005 0.0025  
 -0.2612 0.0062 -0.0044 0.6523 -0.0040  
 0.0005 -0.7110 0.0039 -0.0054 -0.0060  
 0.0132 0.0050 0.0137 0.0093  
 ( 46.69%) -0.6833\* C 39 s( 0.00%)p 1.00( 99.97%)d 0.00( 0.02%)  
 -0.0001 -0.0048 0.0023 0.0001 -0.2638  
 0.0066 0.0017 0.6482 -0.0144 -0.0055  
 -0.7138 0.0129 0.0081 0.0090 -0.0090  
 -0.0039 -0.0043 0.0067

1558. (0.03658) BD\*( 1) C 23 - C 26  
 ( 51.30%) 0.7162\* C 23 s( 23.91%)p 3.18( 76.01%)d 0.00( 0.07%)  
 -0.0003 0.4890 -0.0055 -0.0027 -0.0003  
 -0.4236 -0.0066 0.0002 -0.0470 0.0005  
 -0.0019 0.7603 0.0164 0.0102 0.0010  
 -0.0242 -0.0001 0.0069 0.0093  
 ( 48.70%) -0.6978\* C 26 s( 32.91%)p 2.04( 67.05%)d 0.00( 0.03%)  
 0.0002 0.5734 0.0183 0.0001 -0.0007

0.3768 -0.0128 0.0010 0.0404 0.0037  
 -0.0022 -0.7253 0.0264 0.0054 -0.0006  
 -0.0125 -0.0013 0.0037 0.0127  
 1559. (0.03587) BD\*( 1) C 23 - C 38  
 ( 51.26%) 0.7160\* C 23 s( 24.27%)p 3.12( 75.66%)d 0.00( 0.07%)  
 -0.0003 0.4926 -0.0058 -0.0027 0.0002  
 -0.2136 -0.0013 0.0027 0.7478 0.0151  
 0.0099 -0.3889 -0.0133 -0.0023 -0.0168  
 0.0086 -0.0151 -0.0112 -0.0028  
 ( 48.74%) -0.6981\* C 38 s( 33.14%)p 2.02( 66.83%)d 0.00( 0.03%)  
 0.0002 0.5754 0.0159 0.0008 -0.0006  
 0.1860 -0.0064 0.0016 -0.7162 0.0203  
 0.0055 0.3463 -0.0171 -0.0001 -0.0052  
 0.0044 -0.0119 -0.0114 -0.0037

*Second-order perturbation analysis: donor-acceptor interactions involving the Fe-C  $\sigma$  bond:*

Second Order Perturbation Theory Analysis of Fock Matrix in NBO Basis

Threshold for printing: 0.50 kcal/mol

| Donor NBO (i)         | Acceptor NBO (j)   | E(2)<br>kcal/mol | E(j)-E(i)<br>a.u. | F(i,j)<br>a.u. |
|-----------------------|--------------------|------------------|-------------------|----------------|
| 5. BD ( 1)Fe 1 - C 23 | /263. RY*( 1)Fe 1  | 0.57             | 0.86              | 0.021          |
| 5. BD ( 1)Fe 1 - C 23 | /266. RY*( 4)Fe 1  | 0.87             | 0.93              | 0.027          |
| 5. BD ( 1)Fe 1 - C 23 | /300. RY*( 2)P 3   | 0.63             | 1.49              | 0.029          |
| 5. BD ( 1)Fe 1 - C 23 | /303. RY*( 5)P 3   | 1.04             | 1.17              | 0.033          |
| 5. BD ( 1)Fe 1 - C 23 | /305. RY*( 7)P 3   | 1.11             | 1.45              | 0.038          |
| 5. BD ( 1)Fe 1 - C 23 | /315. RY*( 3)P 4   | 0.53             | 1.36              | 0.025          |
| 5. BD ( 1)Fe 1 - C 23 | /317. RY*( 5)P 4   | 0.90             | 1.14              | 0.030          |
| 5. BD ( 1)Fe 1 - C 23 | /319. RY*( 7)P 4   | 1.72             | 1.38              | 0.046          |
| 5. BD ( 1)Fe 1 - C 23 | /328. RY*( 2)P 5   | 0.57             | 1.51              | 0.028          |
| 5. BD ( 1)Fe 1 - C 23 | /329. RY*( 3)P 5   | 0.63             | 1.36              | 0.028          |
| 5. BD ( 1)Fe 1 - C 23 | /331. RY*( 5)P 5   | 0.67             | 1.18              | 0.027          |
| 5. BD ( 1)Fe 1 - C 23 | /333. RY*( 7)P 5   | 1.90             | 1.44              | 0.050          |
| 5. BD ( 1)Fe 1 - C 23 | /371. RY*( 3)N 8   | 3.86             | 1.19              | 0.064          |
| 5. BD ( 1)Fe 1 - C 23 | /378. RY*( 10)N 8  | 1.14             | 1.87              | 0.044          |
| 5. BD ( 1)Fe 1 - C 23 | /412. RY*( 2)C 11  | 2.10             | 1.13              | 0.046          |
| 5. BD ( 1)Fe 1 - C 23 | /432. RY*( 8)C 12  | 3.50             | 0.47              | 0.038          |
| 5. BD ( 1)Fe 1 - C 23 | /434. RY*( 10)C 12 | 1.29             | 1.63              | 0.044          |
| 5. BD ( 1)Fe 1 - C 23 | /453. RY*( 5)H 15  | 0.80             | 2.95              | 0.046          |
| 5. BD ( 1)Fe 1 - C 23 | /496. RY*( 6)C 20  | 13.77            | 0.19              | 0.048          |
| 5. BD ( 1)Fe 1 - C 23 | /512. RY*( 8)C 21  | 3.90             | 0.42              | 0.039          |
| 5. BD ( 1)Fe 1 - C 23 | /513. RY*( 9)C 21  | 3.23             | 0.66              | 0.044          |
| 5. BD ( 1)Fe 1 - C 23 | /524. RY*( 1)C 23  | 3.81             | 1.47              | 0.071          |
| 5. BD ( 1)Fe 1 - C 23 | /531. RY*( 8)C 23  | 2.41             | 3.06              | 0.082          |
| 5. BD ( 1)Fe 1 - C 23 | /545. RY*( 8)C 24  | 0.62             | 1.10              | 0.025          |

|                       |                     |       |      |       |
|-----------------------|---------------------|-------|------|-------|
| 5. BD ( 1)Fe 1 - C 23 | /548. RY*( 11) C 24 | 1.47  | 0.68 | 0.030 |
| 5. BD ( 1)Fe 1 - C 23 | /569. RY*( 13) C 26 | 0.56  | 1.46 | 0.027 |
| 5. BD ( 1)Fe 1 - C 23 | /584. RY*( 14) C 27 | 4.48  | 0.63 | 0.051 |
| 5. BD ( 1)Fe 1 - C 23 | /588. RY*( 4) H 28  | 2.49  | 1.14 | 0.051 |
| 5. BD ( 1)Fe 1 - C 23 | /615. RY*( 12) C 30 | 5.84  | 0.42 | 0.047 |
| 5. BD ( 1)Fe 1 - C 23 | /631. RY*( 9) C 32  | 1.63  | 1.14 | 0.041 |
| 5. BD ( 1)Fe 1 - C 23 | /652. RY*( 12) C 34 | 5.10  | 0.35 | 0.040 |
| 5. BD ( 1)Fe 1 - C 23 | /676. RY*( 3) H 37  | 0.51  | 1.83 | 0.029 |
| 5. BD ( 1)Fe 1 - C 23 | /677. RY*( 4) H 37  | 1.46  | 1.03 | 0.037 |
| 5. BD ( 1)Fe 1 - C 23 | /700. RY*( 8) C 39  | 0.63  | 2.53 | 0.038 |
| 5. BD ( 1)Fe 1 - C 23 | /735. RY*( 6) C 43  | 2.67  | 0.62 | 0.038 |
| 5. BD ( 1)Fe 1 - C 23 | /736. RY*( 7) C 43  | 0.80  | 0.84 | 0.025 |
| 5. BD ( 1)Fe 1 - C 23 | /739. RY*( 10) C 43 | 0.59  | 1.10 | 0.024 |
| 5. BD ( 1)Fe 1 - C 23 | /743. RY*( 14) C 43 | 3.25  | 1.35 | 0.063 |
| 5. BD ( 1)Fe 1 - C 23 | /754. RY*( 1) H 46  | 5.82  | 0.38 | 0.045 |
| 5. BD ( 1)Fe 1 - C 23 | /757. RY*( 4) H 46  | 0.80  | 1.10 | 0.028 |
| 5. BD ( 1)Fe 1 - C 23 | /764. RY*( 6) C 47  | 1.28  | 1.17 | 0.037 |
| 5. BD ( 1)Fe 1 - C 23 | /776. RY*( 4) H 48  | 0.65  | 0.54 | 0.018 |
| 5. BD ( 1)Fe 1 - C 23 | /785. RY*( 3) H 50  | 4.77  | 0.96 | 0.064 |
| 5. BD ( 1)Fe 1 - C 23 | /794. RY*( 7) C 51  | 0.55  | 1.71 | 0.029 |
| 5. BD ( 1)Fe 1 - C 23 | /795. RY*( 8) C 51  | 3.39  | 0.73 | 0.047 |
| 5. BD ( 1)Fe 1 - C 23 | /804. RY*( 4) H 52  | 0.60  | 1.90 | 0.032 |
| 5. BD ( 1)Fe 1 - C 23 | /808. RY*( 3) C 53  | 2.92  | 0.71 | 0.043 |
| 5. BD ( 1)Fe 1 - C 23 | /822. RY*( 3) H 54  | 0.82  | 2.33 | 0.042 |
| 5. BD ( 1)Fe 1 - C 23 | /827. RY*( 3) H 55  | 0.52  | 2.36 | 0.033 |
| 5. BD ( 1)Fe 1 - C 23 | /833. RY*( 4) H 56  | 0.55  | 0.49 | 0.016 |
| 5. BD ( 1)Fe 1 - C 23 | /846. RY*( 12) C 57 | 0.67  | 2.21 | 0.037 |
| 5. BD ( 1)Fe 1 - C 23 | /848. RY*( 14) C 57 | 7.14  | 0.79 | 0.071 |
| 5. BD ( 1)Fe 1 - C 23 | /850. RY*( 2) H 58  | 1.26  | 0.70 | 0.028 |
| 5. BD ( 1)Fe 1 - C 23 | /854. RY*( 1) H 59  | 1.34  | 0.76 | 0.030 |
| 5. BD ( 1)Fe 1 - C 23 | /857. RY*( 4) H 59  | 3.54  | 0.54 | 0.041 |
| 5. BD ( 1)Fe 1 - C 23 | /859. RY*( 1) H 60  | 0.65  | 0.91 | 0.023 |
| 5. BD ( 1)Fe 1 - C 23 | /861. RY*( 3) H 60  | 1.22  | 1.97 | 0.047 |
| 5. BD ( 1)Fe 1 - C 23 | /864. RY*( 1) C 61  | 0.88  | 1.33 | 0.032 |
| 5. BD ( 1)Fe 1 - C 23 | /890. RY*( 13) C 62 | 0.72  | 1.59 | 0.032 |
| 5. BD ( 1)Fe 1 - C 23 | /891. RY*( 14) C 62 | 0.55  | 1.73 | 0.029 |
| 5. BD ( 1)Fe 1 - C 23 | /901. RY*( 5) H 64  | 3.15  | 1.83 | 0.072 |
| 5. BD ( 1)Fe 1 - C 23 | /910. RY*( 4) C 66  | 2.18  | 0.96 | 0.044 |
| 5. BD ( 1)Fe 1 - C 23 | /918. RY*( 12) C 66 | 2.46  | 1.24 | 0.053 |
| 5. BD ( 1)Fe 1 - C 23 | /928. RY*( 3) H 68  | 13.25 | 0.43 | 0.071 |
| 5. BD ( 1)Fe 1 - C 23 | /930. RY*( 5) H 68  | 0.91  | 2.71 | 0.047 |
| 5. BD ( 1)Fe 1 - C 23 | /931. RY*( 1) H 69  | 1.12  | 0.98 | 0.032 |
| 5. BD ( 1)Fe 1 - C 23 | /932. RY*( 2) H 69  | 10.78 | 0.55 | 0.074 |
| 5. BD ( 1)Fe 1 - C 23 | /935. RY*( 5) H 69  | 1.12  | 2.62 | 0.051 |
| 5. BD ( 1)Fe 1 - C 23 | /961. RY*( 7) C 72  | 0.76  | 0.74 | 0.023 |
| 5. BD ( 1)Fe 1 - C 23 | /966. RY*( 12) C 72 | 19.18 | 0.24 | 0.065 |
| 5. BD ( 1)Fe 1 - C 23 | /978. RY*( 5) C 74  | 1.79  | 0.86 | 0.037 |
| 5. BD ( 1)Fe 1 - C 23 | /979. RY*( 6) C 74  | 5.12  | 0.75 | 0.059 |

|                       |                           |       |      |       |
|-----------------------|---------------------------|-------|------|-------|
| 5. BD ( 1)Fe 1 - C 23 | /980. RY*( 7) C 74        | 1.45  | 0.87 | 0.034 |
| 5. BD ( 1)Fe 1 - C 23 | /982. RY*( 9) C 74        | 4.59  | 0.92 | 0.062 |
| 5. BD ( 1)Fe 1 - C 23 | /985. RY*( 12) C 74       | 2.97  | 1.37 | 0.061 |
| 5. BD ( 1)Fe 1 - C 23 | /992. RY*( 5) H 75        | 1.19  | 2.22 | 0.049 |
| 5. BD ( 1)Fe 1 - C 23 | /***. RY*( 6) C 78        | 3.08  | 1.03 | 0.054 |
| 5. BD ( 1)Fe 1 - C 23 | /***. RY*( 12) C 78       | 0.96  | 1.33 | 0.034 |
| 5. BD ( 1)Fe 1 - C 23 | /***. RY*( 2) C 86        | 1.36  | 0.77 | 0.031 |
| 5. BD ( 1)Fe 1 - C 23 | /***. RY*( 5) C 86        | 1.23  | 0.97 | 0.033 |
| 5. BD ( 1)Fe 1 - C 23 | /***. RY*( 7) C 86        | 0.81  | 1.27 | 0.030 |
| 5. BD ( 1)Fe 1 - C 23 | /***. RY*( 8) C 86        | 0.51  | 0.98 | 0.021 |
| 5. BD ( 1)Fe 1 - C 23 | /***. RY*( 9) C 86        | 1.16  | 1.40 | 0.038 |
| 5. BD ( 1)Fe 1 - C 23 | /***. RY*( 1) H 89        | 0.54  | 0.92 | 0.021 |
| 5. BD ( 1)Fe 1 - C 23 | /***. RY*( 2) H 89        | 9.27  | 0.67 | 0.075 |
| 5. BD ( 1)Fe 1 - C 23 | /***. RY*( 4) C 90        | 10.95 | 0.31 | 0.055 |
| 5. BD ( 1)Fe 1 - C 23 | /***. RY*( 9) C 90        | 0.77  | 0.85 | 0.024 |
| 5. BD ( 1)Fe 1 - C 23 | /***. RY*( 11) C 90       | 0.73  | 0.75 | 0.022 |
| 5. BD ( 1)Fe 1 - C 23 | /***. RY*( 13) C 92       | 1.62  | 0.85 | 0.035 |
| 5. BD ( 1)Fe 1 - C 23 | /***. RY*( 4) H 102       | 1.02  | 0.67 | 0.025 |
| 5. BD ( 1)Fe 1 - C 23 | /***. RY*( 5) H 103       | 0.88  | 2.79 | 0.047 |
| 5. BD ( 1)Fe 1 - C 23 | /***. RY*( 4) C 112       | 2.27  | 0.90 | 0.043 |
| 5. BD ( 1)Fe 1 - C 23 | /***. RY*( 6) C 112       | 2.37  | 0.65 | 0.037 |
| 5. BD ( 1)Fe 1 - C 23 | /***. RY*( 7) C 112       | 2.49  | 0.74 | 0.041 |
| 5. BD ( 1)Fe 1 - C 23 | /***. RY*( 8) C 112       | 0.58  | 1.91 | 0.032 |
| 5. BD ( 1)Fe 1 - C 23 | /***. RY*( 4) H 113       | 2.34  | 0.39 | 0.029 |
| 5. BD ( 1)Fe 1 - C 23 | /***. RY*( 6) C 116       | 4.87  | 0.49 | 0.047 |
| 5. BD ( 1)Fe 1 - C 23 | /***. RY*( 7) C 116       | 10.17 | 0.31 | 0.053 |
| 5. BD ( 1)Fe 1 - C 23 | /***. RY*( 4) H 117       | 2.79  | 0.41 | 0.032 |
| 5. BD ( 1)Fe 1 - C 23 | /***. RY*( 1) H 119       | 0.79  | 0.89 | 0.025 |
| 5. BD ( 1)Fe 1 - C 23 | /***. RY*( 4) H 119       | 1.65  | 0.92 | 0.037 |
| 5. BD ( 1)Fe 1 - C 23 | /***. RY*( 4) C 127       | 4.63  | 0.83 | 0.059 |
| 5. BD ( 1)Fe 1 - C 23 | /***. RY*( 3) H 128       | 3.11  | 1.36 | 0.062 |
| 5. BD ( 1)Fe 1 - C 23 | /***. BD*( 1)Fe 1 - P 3   | 7.31  | 0.66 | 0.065 |
| 5. BD ( 1)Fe 1 - C 23 | /***. BD*( 1)Fe 1 - P 4   | 6.04  | 0.64 | 0.058 |
| 5. BD ( 1)Fe 1 - C 23 | /***. BD*( 1)Fe 1 - P 5   | 7.73  | 0.66 | 0.067 |
| 5. BD ( 1)Fe 1 - C 23 | /***. BD*( 1)Fe 1 - N 8   | 8.40  | 0.63 | 0.068 |
| 5. BD ( 1)Fe 1 - C 23 | /***. BD*( 1)Fe 1 - C 23  | 4.92  | 0.55 | 0.048 |
| 5. BD ( 1)Fe 1 - C 23 | /***. BD*( 1) P 3 - C 20  | 2.43  | 0.53 | 0.034 |
| 5. BD ( 1)Fe 1 - C 23 | /***. BD*( 1) P 3 - C 30  | 3.29  | 0.49 | 0.037 |
| 5. BD ( 1)Fe 1 - C 23 | /***. BD*( 1) P 3 - C 36  | 0.77  | 0.47 | 0.018 |
| 5. BD ( 1)Fe 1 - C 23 | /***. BD*( 1) P 4 - C 61  | 2.52  | 0.53 | 0.034 |
| 5. BD ( 1)Fe 1 - C 23 | /***. BD*( 1) P 4 - C 72  | 3.78  | 0.48 | 0.040 |
| 5. BD ( 1)Fe 1 - C 23 | /***. BD*( 1) P 4 - C 78  | 0.93  | 0.47 | 0.019 |
| 5. BD ( 1)Fe 1 - C 23 | /***. BD*( 1) P 5 - C 29  | 2.49  | 0.53 | 0.034 |
| 5. BD ( 1)Fe 1 - C 23 | /***. BD*( 1) P 5 - C 70  | 0.95  | 0.47 | 0.020 |
| 5. BD ( 1)Fe 1 - C 23 | /***. BD*( 1) P 5 - C 92  | 3.17  | 0.48 | 0.036 |
| 5. BD ( 1)Fe 1 - C 23 | /***. BD*( 1) C 11 - C 39 | 6.70  | 0.86 | 0.071 |
| 5. BD ( 1)Fe 1 - C 23 | /***. BD*( 2) C 11 - C 39 | 1.46  | 0.31 | 0.019 |
| 5. BD ( 1)Fe 1 - C 23 | /***. BD*( 1) C 20 - C 26 | 5.95  | 0.43 | 0.048 |

|                       |                             |      |      |       |
|-----------------------|-----------------------------|------|------|-------|
| 5. BD ( 1)Fe 1 - C 23 | /***. BD*( 1) C 23 - C 26   | 1.21 | 0.68 | 0.027 |
| 5. BD ( 1)Fe 1 - C 23 | /***. BD*( 1) C 23 - C 38   | 4.61 | 0.55 | 0.048 |
| 5. BD ( 1)Fe 1 - C 23 | /***. BD*( 1) C 27 - C 38   | 5.99 | 0.86 | 0.068 |
| 5. BD ( 1)Fe 1 - C 23 | /***. BD*( 2) C 27 - C 38   | 2.45 | 0.32 | 0.026 |
| 5. BD ( 1)Fe 1 - C 23 | /***. BD*( 1) C 66 - H 67   | 9.18 | 0.27 | 0.047 |
| 5. BD ( 1)Fe 1 - C 23 | /***. BD*( 1) C 66 - C 72   | 2.11 | 0.49 | 0.031 |
| 5. BD ( 1)Fe 1 - C 23 | /***. BD*( 1) C 74 - H 75   | 2.73 | 0.68 | 0.041 |
| 5. BD ( 1)Fe 1 - C 23 | /***. BD*( 1) C 112 - H 113 | 0.68 | 0.82 | 0.022 |
| 5. BD ( 1)Fe 1 - C 23 | /***. BD*( 1) C 116 - H 117 | 3.29 | 0.51 | 0.039 |
